# Supplementary material for: Genome-Wide Identification, Evolutionary Analysis, and Stress Responses of the GRAS Gene Family in Castor Beans
Source: PubMed Central journal article supplement (PMC4964380; doi:10.3390/ijms17071004), 2016-06-24
Supplement: ijms-17-01004-s001.pdf [file ijms-17-01004-s001.pdf]

# Supplementary Materials: Genome-Wide Identification, Evolutionary Analysis and Stress Responses of GRAS Gene Family in Castor Bean

Wei Xu, Zexi Chen, Naem Ahmed, Bing Han, Qinghua Cui and Aizhong Liu

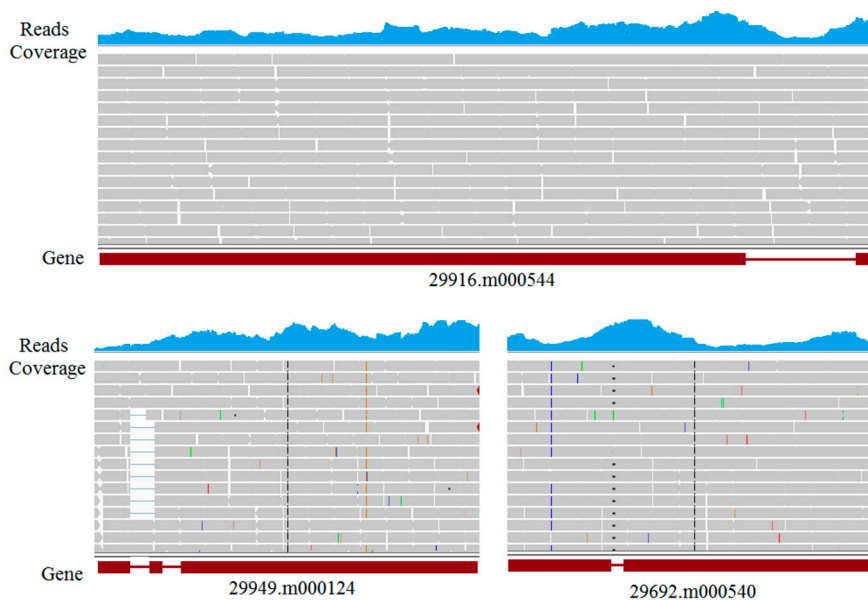

Figure S1. Visualization of the reads coverage on genic regions of three predicted GRAS genes.

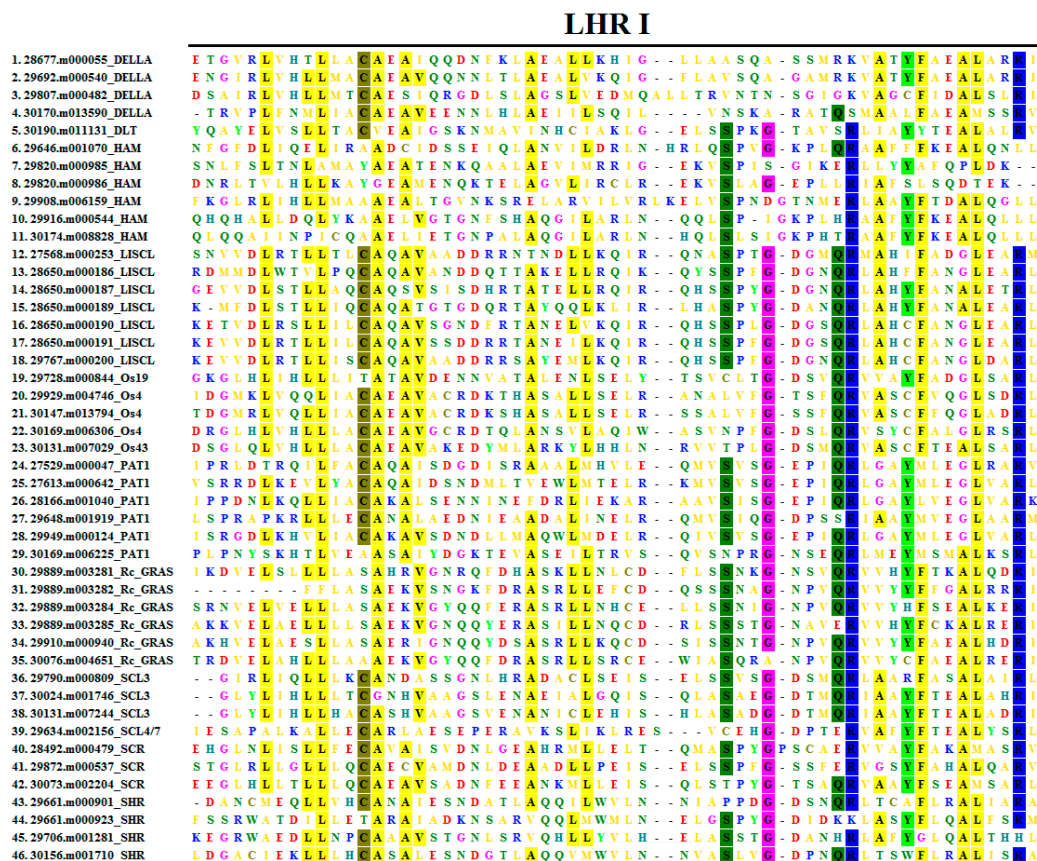

Figure S2. Cont.

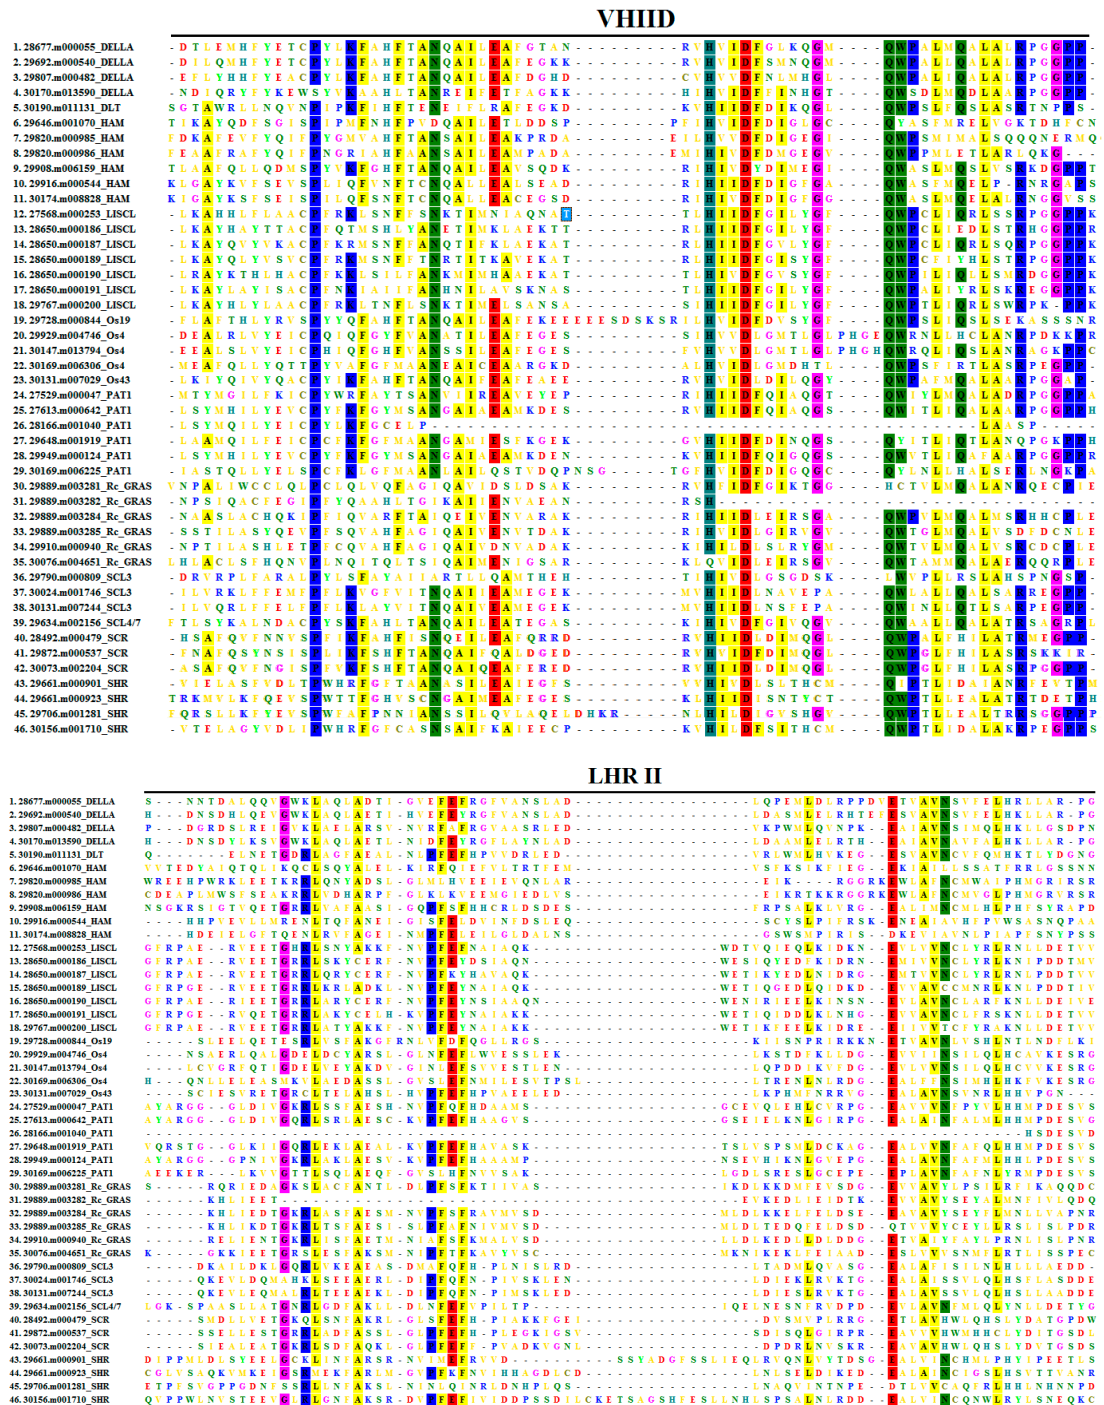

Figure S2. Cont.

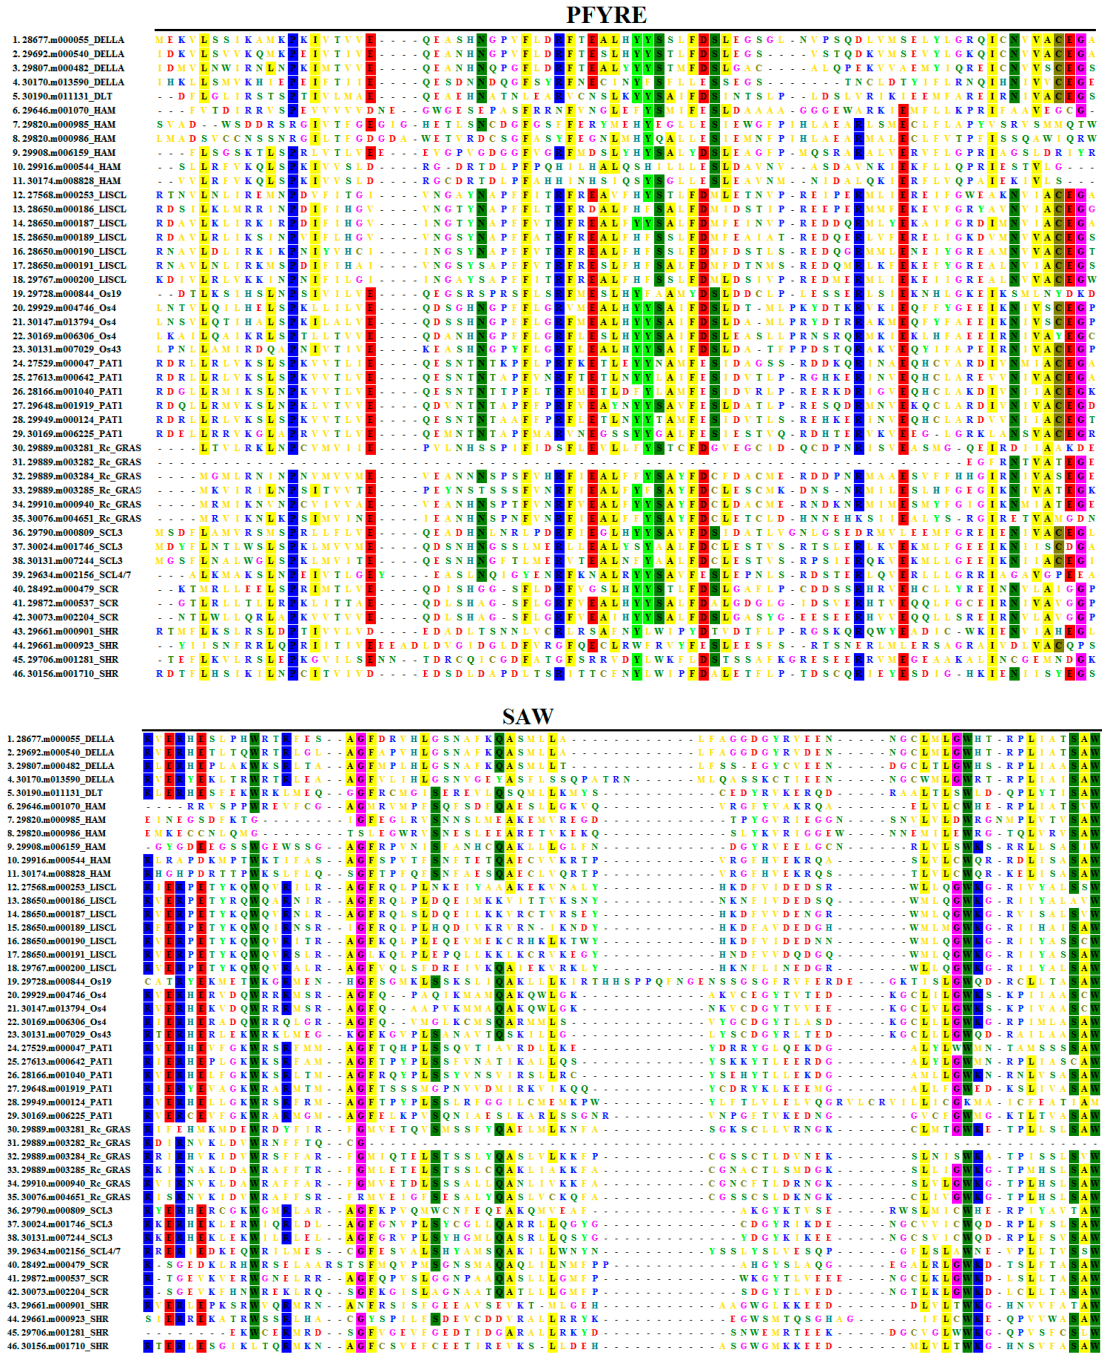

Figure S2. Multiple sequences alignment of amino acid of the conserved domains including LHR I, VHIIID, LHR II, PFIYE and SAM in castor bean.

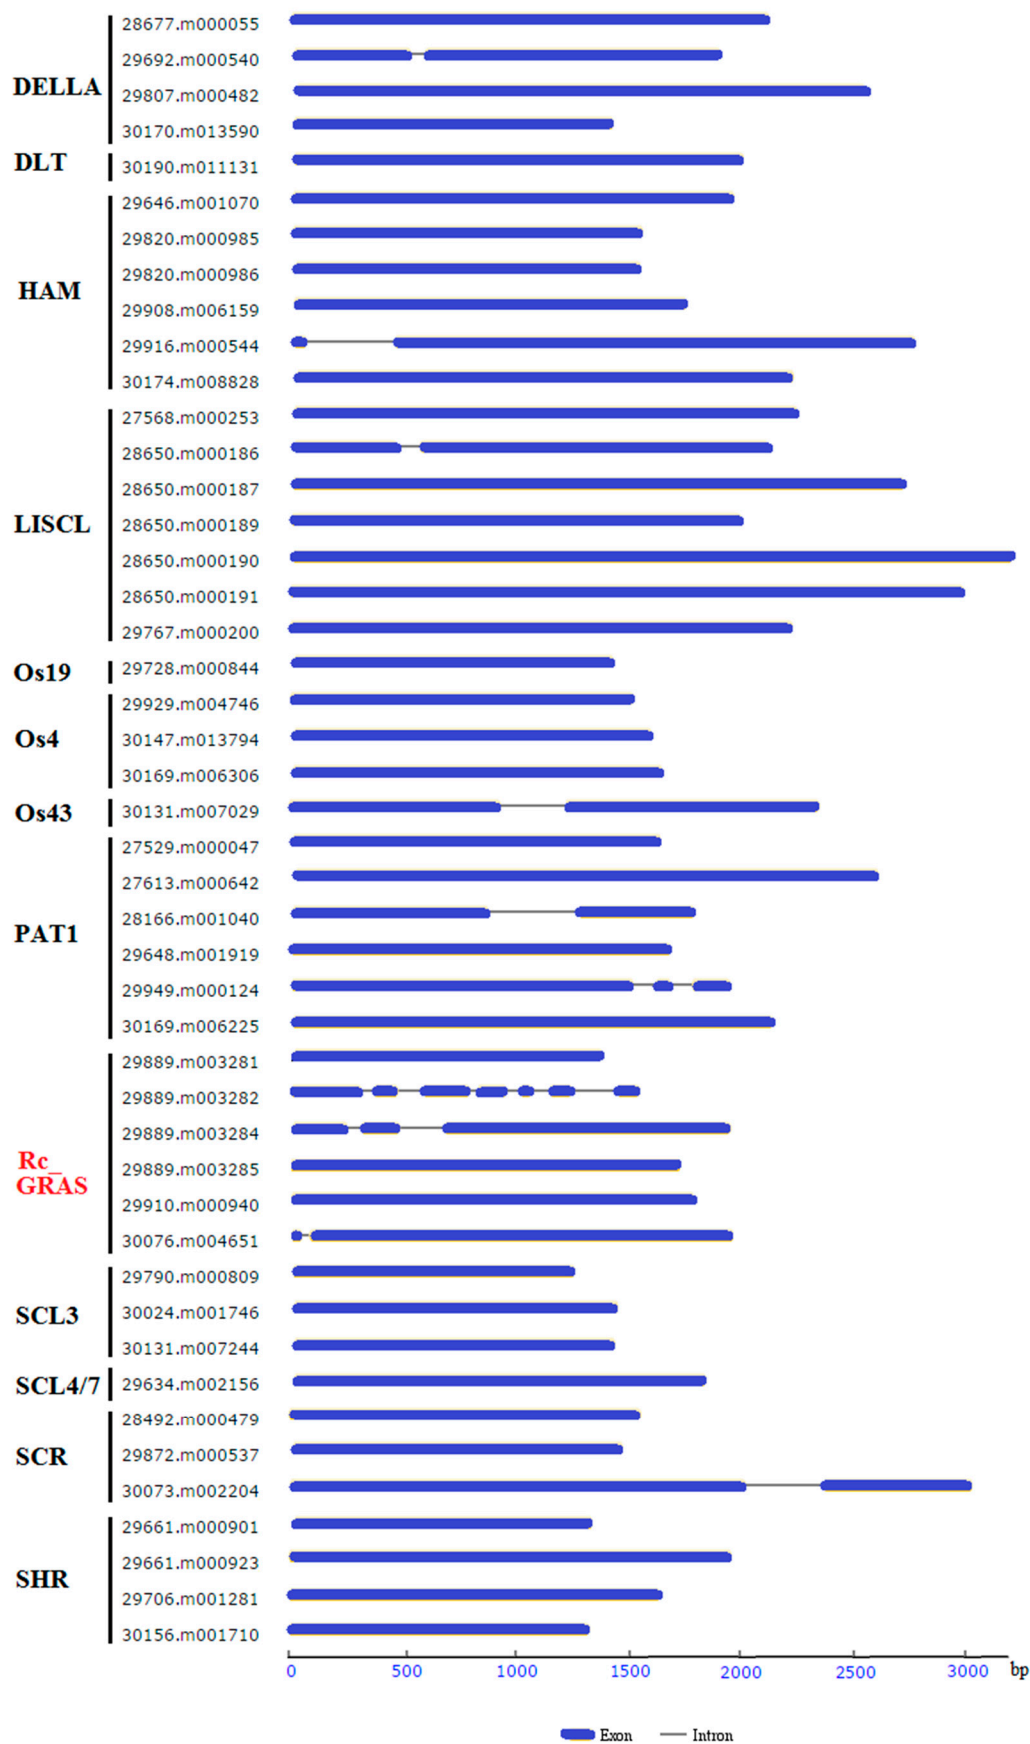

Figure S3. Gene structures of GRAS members in castor bean.

**Table S1.** The information of 48 GRAS transcription factors identified in castor bean genome.

| Gene Model     | Scaffold | Gene Start | Gene End | Orientation | Domain Number | E-Value (Pfam) | CDS Length | Protein Length | Molecular Weight/Da | Theoretical pI | Reads Coverage (>10) | Homologs in <i>Arabidopsis</i> |
|----------------|----------|------------|----------|-------------|---------------|----------------|------------|----------------|---------------------|----------------|----------------------|--------------------------------|
| 27529.m000047  | 27529    | 20956      | 22584    | +           | 1             | 1.00E-123      | 1629       | 542            | 61122.84            | 5.72           | yes                  | AT4G17230.1                    |
| 27568.m000253  | 27568    | 19777      | 22002    | +           | 1             | 1.00E-120      | 2226       | 741            | 83116.30            | 5.37           | yes                  | AT1G07530.1                    |
| 27613.m000642  | 27613    | 218157     | 220737   | -           | 1             | 2.70E-137      | 1617       | 538            | 60047.72            | 5.50           | yes                  | AT1G50600.1                    |
| 28166.m001040  | 28166    | 23949      | 25728    | -           | 2             | 6.40E-17       | 1380       | 459            | 51523.05            | 6.25           | yes                  | AT5G48150.1                    |
| 28492.m000479  | 28492    | 123817     | 125376   | -           | 1             | 7.10E-104      | 1560       | 519            | 58016.83            | 5.92           | no                   | AT3G54220.1                    |
| 28650.m000186  | 28650    | 27256      | 29354    | -           | 1             | 2.30E-108      | 1992       | 663            | 75257.66            | 5.92           | no                   | AT1G07530.1                    |
| 28650.m000187  | 28650    | 31218      | 33926    | -           | 1             | 2.80E-118      | 2067       | 688            | 78173.80            | 6.32           | yes                  | AT1G07530.1                    |
| 28650.m000189  | 28650    | 41918      | 43906    | -           | 1             | 1.80E-112      | 1989       | 662            | 75340.73            | 6.16           | no                   | AT1G07530.1                    |
| 28650.m000190  | 28650    | 48435      | 51623    | -           | 1             | 1.60E-113      | 2448       | 815            | 90986.60            | 5.17           | yes                  | AT1G07530.1                    |
| 28650.m000191  | 28650    | 57247      | 60227    | -           | 1             | 6.90E-110      | 2295       | 764            | 85580.05            | 5.28           | yes                  | AT1G07530.1                    |
| 28677.m000055  | 28677    | 3350       | 5464     | +           | 1             | 3.40E-36       | 1704       | 567            | 62550.40            | 5.14           | yes                  | AT3G03450.1                    |
| 28966.m000535  | 28966    | 125327     | 126678   | -           | 1             | 4.10E-15       | 483        | 160            | 17305.22            | 5.88           | no                   | AT1G55580.1                    |
| 29634.m002156  | 29634    | 607639     | 609465   | +           | 1             | 7.20E-109      | 1827       | 608            | 66887.21            | 4.96           | yes                  | AT5G66770.1                    |
| 29646.m001070  | 29646    | 113881     | 115836   | -           | 1             | 4.80E-87       | 1620       | 539            | 60899.08            | 6.03           | yes                  | AT4G36710.1                    |
| 29648.m001919  | 29648    | 47547      | 49226    | -           | 1             | 5.10E-136      | 1680       | 559            | 62597.52            | 4.89           | yes                  | AT1G21450.1                    |
| 29661.m000901  | 29661    | 20973      | 22295    | -           | 1             | 1.60E-89       | 1323       | 440            | 49288.28            | 5.58           | yes                  | AT3G49950.1                    |
| 29661.m000923  | 29661    | 255682     | 257645   | +           | 1             | 7.40E-104      | 1539       | 512            | 58194.98            | 5.87           | yes                  | AT4G37650.1                    |
| 29692.m000540* | 29692    | 243910     | 245798   | +           | 1             | 2.80E-37       | 1830       | 609            | 67287.91            | 5.73           | yes                  | AT1G14920.1                    |
| 29706.m001281  | 29706    | 78273      | 79919    | -           | 1             | 4.20E-78       | 1647       | 548            | 60960.68            | 5.85           | yes                  | AT3G13840.1                    |
| 29728.m000844  | 29728    | 310370     | 311785   | -           | 1             | 4.20E-89       | 1416       | 471            | 53630.99            | 6.17           | no                   | AT3G54220.1                    |
| 29767.m000200  | 29767    | 26535      | 28757    | +           | 1             | 2.80E-112      | 2223       | 740            | 83933.94            | 8.40           | yes                  | AT2G37650.1                    |
| 29790.m000809  | 29790    | 48786      | 50036    | -           | 1             | 4.30E-99       | 1251       | 416            | 46776.87            | 6.40           | yes                  | AT1G50420.1                    |
| 29807.m000482  | 29807    | 100421     | 102935   | -           | 1             | 5.90E-32       | 1611       | 536            | 58616.68            | 5.27           | yes                  | AT2G01570.1                    |
| 29820.m000985  | 29820    | 38524      | 40077    | -           | 1             | 2.90E-41       | 1554       | 517            | 59681.48            | 4.82           | no                   | AT4G08250.1                    |
| 29820.m000986  | 29820    | 44796      | 46325    | +           | 1             | 8.90E-38       | 1530       | 509            | 57484.06            | 4.83           | no                   | AT5G66770.1                    |
| 29872.m000537  | 29872    | 117231     | 118693   | -           | 1             | 8.40E-114      | 1329       | 442            | 48239.49            | 5.45           | yes                  | AT5G41920.1                    |
| 29889.m003281  | 29889    | 213307     | 214671   | -           | 1             | 2.00E-72       | 1365       | 454            | 51417.81            | 8.39           | no                   | AT3G03450.1                    |
| 29889.m003282  | 29889    | 216102     | 217643   | -           | 1             | 2.30E-10       | 1008       | 335            | 38304.95            | 5.10           | no                   | AT3G03450.1                    |
| 29889.m003284  | 29889    | 221800     | 223738   | +           | 1             | 5.20E-87       | 1689       | 562            | 64012.76            | 5.50           | no                   | AT1G66350.1                    |
| 29889.m003285  | 29889    | 225519     | 227249   | +           | 1             | 1.10E-82       | 1731       | 576            | 64817.84            | 5.34           | no                   | AT5G17490.1                    |
| 29908.m006159  | 29908    | 273013     | 274753   | +           | 1             | 2.30E-99       | 1476       | 491            | 54282.82            | 5.64           | yes                  | AT4G08250.1                    |
| 29910.m000940  | 29910    | 353874     | 355658   | -           | 1             | 3.40E-92       | 1785       | 594            | 67317.41            | 5.09           | no                   | AT1G66350.1                    |
| 29916.m000544* | 29916    | 241112     | 243860   | -           | 1             | 5.40E-94       | 2364       | 787            | 86369.68            | 6.32           | yes                  | AT4G00150.1                    |
| 29929.m004746  | 29929    | 1419600    | 1421123  | +           | 1             | 2.00E-106      | 1524       | 507            | 56534.09            | 6.86           | no                   | AT1G50420.1                    |
| 29949.m000124* | 29949    | 53044      | 54985    | -           | 1             | 4.30E-123      | 1749       | 582            | 65343.70            | 6.30           | yes                  | AT5G48150.1                    |
| 29957.m001404  | 29957    | 285159     | 285539   | -           | 1             | 4.60E-09       | 267        | 88             | 10096.76            | 10.21          | no                   | AT2G01570.1                    |
| 30024.m001746  | 30024    | 1148008    | 1149444  | -           | 1             | 8.80E-138      | 1356       | 451            | 50679.56            | 6.38           | yes                  | AT1G50420.1                    |



Table S1. Cont.

| Gene Model    | Scaffold | Gene Start | Gene End | Orientation | Domain Number | E-Value (Pfam) | CDS Length | Protein Length | Molecular Weight/Da | Theoretical pI | Reads Coverage (>10) | Homologs in Arabidopsis |
|---------------|----------|------------|----------|-------------|---------------|----------------|------------|----------------|---------------------|----------------|----------------------|-------------------------|
| 30073.m002204 | 30073    | 100179     | 103200   | +           | 1             | 1.40E-124      | 2532       | 843            | 90820.90            | 6.11           | yes                  | AT3G54220.1             |
| 30076.m004651 | 30076    | 1394867    | 1396826  | +           | 1             | 1.00E-81       | 1929       | 642            | 73135.35            | 6.36           | no                   | AT3G03450.1             |
| 30131.m007029 | 30131    | 1098698    | 1101046  | -           | 1             | 2.10E-133      | 2061       | 686            | 75615.20            | 5.70           | no                   | AT3G54220.1             |
| 30131.m007244 | 30131    | 2435990    | 2437414  | -           | 1             | 2.30E-135      | 1425       | 474            | 53756.93            | 5.93           | yes                  | AT1G50420.1             |
| 30147.m013794 | 30147    | 2621522    | 2623102  | +           | 1             | 6.50E-111      | 1581       | 526            | 58433.45            | 5.78           | no                   | AT1G66350.1             |
| 30156.m001710 | 30156    | 550167     | 551501   | -           | 1             | 2.60E-86       | 1335       | 444            | 49717.52            | 5.13           | no                   | AT3G49950.1             |
| 30169.m006225 | 30169    | 2156081    | 2158208  | -           | 1             | 5.70E-111      | 1848       | 615            | 67440.71            | 6.16           | yes                  | AT5G52510.1             |
| 30169.m006306 | 30169    | 395846     | 397483   | +           | 1             | 1.30E-109      | 1638       | 545            | 61000.11            | 4.99           | no                   | AT1G50420.1             |
| 30170.m013590 | 30170    | 584630     | 586045   | -           | 1             | 2.80E-92       | 1416       | 471            | 53788.61            | 5.68           | no                   | AT2G01570.1             |
| 30174.m008828 | 30174    | 547369     | 549570   | -           | 1             | 2.20E-95       | 2202       | 733            | 80414.81            | 5.73           | yes                  | AT4G00150.1             |
| 30190.m011131 | 30190    | 2053590    | 2055578  | -           | 1             | 1.20E-127      | 1989       | 662            | 73717.04            | 5.70           | yes                  | AT1G63100.1             |

Table S2. Summary of conserved motifs identified from the GRAS proteins in castor bean.

| Motif 1 |                     |     |          |             |                               |            |
|---------|---------------------|-----|----------|-------------|-------------------------------|------------|
|         |                     |     |          |             |                               |            |
| 2.      | 27568.m000253_LISCL | 475 | 4.85e-31 | IMNIAQNATT  | LHIIDFGILYGFQWPCLIQRLSSRPGGPP | KLRITGIDFP |
| 1.      | 28677.m000055_DELLA | 301 | 4.85e-31 | ILEAFGTANR  | VHVIDFGLKQGMQWPALMQALALRPGGPP | AFRLTGIGPP |
| 25.     | 27613.m000642_PAT1  | 276 | 2.20e-29 | IAEAMKDESR  | VHIIDFQIAQGSQWITLIQALAARPGGPP | HVRLTGIDDS |
| 2.      | 29692.m000540_DELLA | 341 | 2.20e-29 | ILEAFEGKKR  | VHVIDFSMNQGMQWPALLQALALRPGGPP | AFRLTGIGPP |
| 28.     | 29949.m000124_PAT1  | 285 | 4.44e-29 | IAEAMKDENEK | VHIIDFQIQGSQWVTLIQAFARPGGPP   | RIRITGIDDS |
| 14.     | 28650.m000187_LISCL | 421 | 6.28e-29 | IFKLAEKATR  | LHIIDFGVLYGFQWPCLIQRLSQRPGGPP | KLRITGIELP |
| 42.     | 30073.m002204_SCR   | 563 | 2.04e-28 | IQEAFEREDR  | VHIIDLDMQGLQWPGLFHILASRPGGPP  | YVRLTGLGTS |
| 3.      | 29807.m000482_DELLA | 255 | 3.34e-28 | ILEAFDGHDC  | VHVVDNFLMHGLQWPALIQALALRPGGPP | LLRLTGIGPP |
| 15.     | 28650.m000189_LISCL | 396 | 6.36e-28 | ITKAVEKATR  | LHIIDFGISYGFQWPCFIYHLSTRPGGPP | KVRITGIDYP |
| 24.     | 27529.m000047_PAT1  | 280 | 8.73e-28 | IREAVEYEPR  | IHIIDFQIAQGTQWIYLMQALADRPGGPP | AIRITGVDDP |
| 23.     | 30131.m007029_Os43  | 434 | 2.22e-27 | IFEAFEAEER  | VHVIDLDILQGYQWPAFMQALAARPGGAP | FLRITGVGSC |
| 13.     | 28650.m000186_LISCL | 396 | 2.22e-27 | IMKLAEKTR   | LHIIDFGILYGFQWPCLIEDLSTRHGGPP | RLHITGIEFP |

Table S2. Cont.

|     |                       |     |          |            |                                |             |
|-----|-----------------------|-----|----------|------------|--------------------------------|-------------|
| 17. | 28650.m000191_LISCL   | 499 | 4.07e-27 | ILAVSKNAST | LHIIDFGILYGFQWPALIYRLSKREGGPP  | KLRITGIELP  |
| 40. | 28492.m000479_SCR     | 262 | 6.37e-27 | ILEAFQRRDR | VHIIDLDIMQGLQWPALFHILATRMEGPP  | HIRMTGMGTS  |
| 46. | 30156.m001710_SHR     | 155 | 2.36e-26 | IFKAIIECPK | VHILDFSITHCMQWPTLIDALAKRPEGPP  | SLRITVPFTR  |
| 18. | 29767.m000200_LISCL   | 476 | 3.61e-26 | IMELSANSAS | IHIIDFGILYGFQWPTLIQRLSWRPKPPK  | VRITGIDFPQ  |
| 5.  | 30190.m011131_DLT     | 391 | 3.22e-25 | FLRAFEGKDK | VHIIDFDIKQGLQWPSLFQSLASRTNPPS  | HVRITGIGES  |
| 4.  | 30170.m013590_DELLA   | 192 | 6.21e-25 | IFETFAGKKH | IHVIDFFINHGTTQWSDLMQDLAARPGGPP | TIRISGIGFP  |
| 27. | 29648.m001919_PAT1    | 296 | 1.04e-24 | MIESFKGEGK | VHIIDFDINQGSQYITLIQTLANQPGKPP  | HLRLTGIDDP  |
| 39. | 29634.m002156_SCL4/7  | 344 | 1.34e-24 | ILEATEGASK | IHIVDFGIVQGVQWAALLQALATRSAGRP  | LSIRISGIPA  |
| 16. | 28650.m000190_LISCL   | 549 | 1.73e-24 | IMHAAEKATT | LHIVDFGVSYGFQWPILIQLLSMRDGGPP  | KLRITGIELP  |
| 9.  | 29908.m006159_HAM     | 220 | 6.79e-24 | ILEAVSQDKR | IHIVDYDIMEGIQWASLMQSLVSRKDGPP  | TPHLRITALS  |
| 11. | 30174.m008828_HAM     | 481 | 8.66e-24 | LLEACEGSDR | IHIVDFDIGFGGQWASLMQELALRNGGVS  | SLKITAFVSP  |
| 41. | 29872.m000537_SCR     | 188 | 2.24e-22 | IFQALDGEDR | VHVIDFDIMQGLQWPGLFHILASRSKIR   | SMRITGFGSS  |
| 45. | 29706.m001281_SHR     | 276 | 4.35e-22 | LAQELDHKRN | LHILDIGVSHGVQWPTLLEALTRRSGGPP  | PLVRITVITA  |
| 22. | 30169.m006306_Os4     | 280 | 4.85e-22 | ICEAARGKDA | LHVIDLGMMDHTLQWPSFIRTLASRPEGPP | KVRITGLIND  |
| 29. | 30169.m006225_PAT1    | 352 | 6.84e-21 | TVDQPNSGTG | FHVIDFDIGQGCQYLNLLHALSERLNGKP  | ATVKITAVAD  |
| 32. | 29889.m003284_Rc_GRAS | 303 | 7.57e-21 | IVENVARAKR | IHIIDLEIRSGAQWPVLMQALMSRHHCPL  | ELLKISAIGT  |
| 34. | 29910.m000940_Rc_GRAS | 325 | 1.39e-20 | IVDNVADAKK | IHILDLSLRGMQWTVLMQALVSRDCDPL   | EHLKITAIGT  |
| 37. | 30024.m001746_SCL3    | 136 | 2.08e-20 | IIEAMEGEKM | VHIIDLNAVEPAQWLALLQALSARREGPP  | HLRITGIHQQ  |
| 38. | 30131.m007244_SCL3    | 156 | 2.30e-20 | IVEAMEGEKM | VHIIDLNSFEPAQWINLLQTLARPEGPP   | HLRITGIHEQ  |
| 10. | 29916.m000544_HAM     | 535 | 6.14e-20 | LLEALSEADR | IHIIDFDIGFGAQWASFMQELPRNRGAPS  | LKITAFASPS  |
| 44. | 29661.m000923_SHR     | 235 | 8.21e-20 | IMEAFEGESK | LHIIDISNTYCTQWPTLLEALATRTDETP  | HLRLTTIVAS  |
| 19. | 29728.m000844_Os19    | 198 | 3.11e-19 | EEESDSKSRI | LHVIDFDVSYGFQWPSLIQSLSEKASSN   | RISLRITGLG  |
| 30. | 29889.m003281_Rc_GRAS | 180 | 1.36e-18 | VIDSLDSAKR | VHFIDFGIKTGGHCTVLMQALANRQECPI  | ELLKISGVGV  |
| 8.  | 29820.m000986_HAM     | 235 | 1.78e-18 | LEAMPADAEM | IHIVDFDMGEGVQWPPMLETLARLQKGVV  | LTAIKWEQEN  |
| 7.  | 29820.m000985_HAM     | 238 | 2.54e-18 | LEAKPRDAEI | LHVVDVDIGEGIQWPSMIMALSQQNERM   | QQHGYNQRHL  |
| 43. | 29661.m000901_SHR     | 146 | 2.78e-18 | ILEAIEGFSV | VHIVDLSLTHCMQIPTLIDAIANRFEVTP  | MIKLTVAGCT  |
| 33. | 29889.m003285_Rc_GRAS | 318 | 4.73e-18 | IVENVTDAKR | IHVIDLGIRVGVQWTGLMQALVSDFCNL   | ELLKITAVGT  |
| 35. | 30076.m004651_Rc_GRAS | 370 | 8.71e-18 | IMENIGSARK | LQVIDLEIRSGVQWTAMMQALAERQQRPL  | EHLKVITALGL |
| 6.  | 29646.m001070_HAM     | 279 | 1.51e-16 | LETLDDSPPF | IHVIDFDIGLGCQYASFMRELVGKTDHFC  | NKLTSPVLR   |
| 21. | 30147.m013794_Os4     | 271 | 1.19e-15 | FEGESFVHV  | DLGMTLGLPHGHQWRQLIQSLANRAGKPP  | CRLRITAVGL  |
| 36. | 29790.m000809_SCL3    | 144 | 5.48e-15 | LLQAMTHEHT | IHIVDLGSGDSKLWVPLLRSLAHSPPNGSP | HLKFTCLNTD  |
| 20. | 29929.m004746_Os4     | 251 | 8.57e-15 | FEGESSIHVV | DLGMTLGLPHGEQWRNLLHCLANRPDKKP  | RCLRITGVGN  |

Table S2. Cont.

| Motif 2 |                       |     |          |              |                                      |             |
|---------|-----------------------|-----|----------|--------------|--------------------------------------|-------------|
|         |                       |     |          |              |                                      |             |
| 28.     | 29949.m000124_PAT1    | 466 | 1.49e-34 | RINVEQHCLA   | RDVVNIIACEGTERVERHELLGKWRSRFRMAGFTP  | YPLSSLRFGG  |
| 12.     | 27568.m000253_LISCL   | 656 | 3.35e-34 | RMLIEREIFG   | WEAKNVIACEGAERIERPETYKQWQVRILRAGFRQ  | LPLNKEIYAA  |
| 25.     | 27613.m000642_PAT1    | 457 | 6.32e-34 | RINVEQHCLA   | REVVNIVACEGAERIERHEPLGKWKS RFAMAGFTP | YPLSSFVNAT  |
| 18.     | 29767.m000200_LISCL   | 656 | 6.32e-34 | RMLIEKEIIG   | REALNVVACEGWERVERPETYKQWQVRALRAGFVQ  | LSFDREIVKQ  |
| 26.     | 28166.m001040_PAT1    | 378 | 2.51e-33 | RIGVEQHCLA   | KDIVNIIACEGKERVERHELFGKWKSR LTMAGFRQ | YPLSSYVNSV  |
| 2.      | 29692.m000540_DELLA   | 516 | 2.92e-33 | DKVMSEVYLG   | KQICNVVACEGADRVERHETLTQWRTRLGLAGFAP  | VHLG SNAFKQ |
| 27.     | 29648.m001919_PAT1    | 477 | 2.93e-32 | RMNVEKQCLA   | RDIVNIVACEGDERIEREYVAGKWRARMTMAGFTS  | SSMGP NVVDM |
| 13.     | 28650.m000186_LISCL   | 577 | 1.31e-31 | RMMFEKEVFG   | RYAVNVIACEGGERVERPETYRQWQARNIRAGFRQ  | LPLDQEIMKK  |
| 17.     | 28650.m000191_LISCL   | 680 | 3.30e-31 | RLKFEKEFYG   | REALNVIACEGSERVERPETYKQWQVRS LRAGLKQ | LPLEPQLLKK  |
| 20.     | 29929.m004746_Os4     | 424 | 4.28e-31 | RVKIEQFFYG   | EEIKNIVSCEGP ARVERHERVDQWRRRMSRAGFQP | AQIKMAMQAK  |
| 21.     | 30147.m013794_Os4     | 444 | 1.53e-30 | RAKMEQFYFA   | EEIKNIVSCEGP ARVERHEKVDQWRRRMSRAGFQA | APVKMMAQAK  |
| 36.     | 29790.m000809_SCL3    | 334 | 2.22e-30 | DRMVLEEMFG   | REIENIVACEGLERYERHERCGK WGMRLARAGFKP | VQMWCFEQE   |
| 15.     | 28650.m000189_LISCL   | 577 | 4.11e-30 | RLVFERELIG   | KDVMNVVACEGSE RFERPETYKQWQIRNSRIGFRQ | LPLHQDIVKR  |
| 1.      | 28677.m000055_DELLA   | 479 | 9.56e-30 | DLVMSELYLG   | RQICNVVACEGAHRVERHESLPHWRTRFESAGFDR  | VHLG SNAFKQ |
| 3.      | 29807.m000482_DELLA   | 432 | 1.72e-28 | EKVVAEMYIQ   | REICNVVSC EGSARLERHEPLAKWKSRLTAAGFMP | LHLG SNAFKQ |
| 38.     | 30131.m007244_SCL3    | 387 | 2.15e-28 | RQKVEKMLLG   | EEIKNIIACEGIERKERHEKLEK WILRLELAGFGR | VPLSYHGMLQ  |
| 5.      | 30190.m011131_DLT     | 563 | 1.11e-27 | VRIKIEEMFA   | REIRNIVACEGSDRLERHESFEKWRK LMEQGGFRC | MGISEREVLQ  |
| 29.     | 30169.m006225_PAT1    | 531 | 4.88e-27 | ERVKVEEGLG   | RKLAN SVACEGRDRVERCEVFGKWRARMGMAGFEL | KPVSQ NIAES |
| 23.     | 30131.m007029_Os43    | 603 | 1.37e-26 | RAKVEQYIFA   | PEIRNIVACEGPERTERHERLEKWRK LMEGKGFKG | VPLSANA VTQ |
| 37.     | 30024.m001746_SCL3    | 366 | 1.86e-26 | RLKVEKMLFG   | EEIKNIISCDGAERKERHEKLERW IQRLDLAGFGN | VPLSYCGLLQ  |
| 22.     | 30169.m006306_Os4     | 458 | 2.52e-26 | RMKIEKLHFA   | EEIRNIVAYEGCDRIERHERADQWRRQLGRAGFQV  | MGLKCMSQAR  |
| 4.      | 30170.m013590_DELLA   | 362 | 3.95e-25 | NCLDTYIFLR   | NQIHNI VVCEGEYRVERYEKLTRWRTRLEAAGFVL | IHLG SNVGEY |
| 43.     | 29661.m000901_SHR     | 357 | 1.67e-21 | QRQWYEADIC   | WKIENVIAHEGLQRVERLEPKSRWVQRM RNANFRS | ISFGEEAVSE  |
| 34.     | 29910.m000940_Rc_GRAS | 499 | 2.83e-20 | RMIMESMYFG   | IGIKNMIATEGEERVIRNVKLD AWRAFFARFGMVE | TDLSSSALLQ  |
| 32.     | 29889.m003284_Rc_GRAS | 477 | 4.54e-20 | RMAAESVFFH   | HGIRNIVASEGEERRIRHV KIDVWRSFFARFGMIQ | TELSTSSLYQ  |
| 33.     | 29889.m003285_Rc_GRAS | 491 | 8.47e-20 | RMILES LHFHG | EGIKNIVATEGKERKIRNAKLD AWRAFFTRFGMLE | TELSTSSL CQ |
| 46.     | 30156.m001710_SHR     | 357 | 1.69e-19 | QRIEYESDIG   | HKIENIISYEGSQRTERLESGIKLTQRMKNAGFCS  | VEFCEETIRE  |
| 44.     | 29661.m000923_SHR     | 429 | 4.22e-19 | ERLMLERSAG   | RAIVDLVACQPSESIERREKATR WSSRLHACGYSP | ILFSDEVCDD  |



Table S2. Cont.

Motif 3

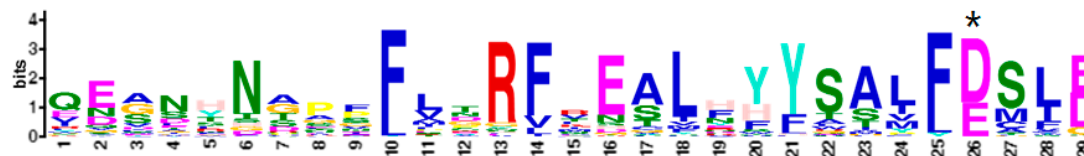

|     |                       |     |          |            |                                     |             |
|-----|-----------------------|-----|----------|------------|-------------------------------------|-------------|
| 21. | 30147.m013794_Os4     | 396 | 4.50e-30 | LSPKILALVE | QDSSHNGPFFLGRFMEALHYYS AIFDSDL      | AMLPRYDTRR  |
| 22. | 30169.m006306_Os4     | 409 | 6.89e-29 | LSPDLLTVVE | QDANHNGPFFLGRFLESLHYYS AIFDLSLE     | ASLLPRNSRQ  |
| 2.  | 29692.m000540_DELLA   | 471 | 1.51e-28 | MKPEIVTIVE | QEANHNGPVFLDRFTESLHYYS TLFDLSLE     | GSVSTQDKVM  |
| 1.  | 28677.m000055_DELLA   | 431 | 1.51e-28 | MKPKIVTVVE | QEASHNGPVFLDRFTEALHYYS SLFDLSLE     | GSGLNVP SQD |
| 34. | 29910.m000940_Rc_GRAS | 451 | 2.68e-28 | VNPCVIVVAE | VEANHNSPTFVNRVFEALFYYS AYFDCLD      | ACMERNDKNR  |
| 20. | 29929.m004746_Os4     | 376 | 1.41e-27 | LSPKLLILVE | QDSGHNGPFFLGRVMEALHYYS AIFDSDL      | TMLPKYDTKR  |
| 14. | 28650.m000187_LISCL   | 554 | 2.85e-27 | IRPDIFIHGV | INGTYNAPFFVTRFREALFYYS ALFDMFE      | INVPREDDQR  |
| 3.  | 29807.m000482_DELLA   | 387 | 1.32e-26 | LNPKIMTVVE | QEANHNPQGFDRFTEALYYYY STMFDSLG      | ACALQPEKVV  |
| 35. | 30076.m004651_Rc_GRAS | 497 | 2.55e-26 | LKPSIMVINE | IEANHNSPNFVNRFIEALFFYS AYFDCLE      | TCLDHNNEHK  |
| 23. | 30131.m007029_Os43    | 555 | 4.86e-26 | QAPNIVTIVE | KEASHNGPYFLGRFLEALHYYS AIFDSDL      | ATFPPDSTQR  |
| 16. | 28650.m000190_LISCL   | 683 | 2.09e-24 | IKPNIYVHCI | INGSYNAPFFVTRFREALHFSS LFDMDFD      | STLSREDQGR  |
| 13. | 28650.m000186_LISCL   | 529 | 2.40e-24 | INPDIFIHGV | VNGTYNAPFFLTRFRDALHFH SALSALFDMID   | STIPREEPER  |
| 25. | 27613.m000642_PAT1    | 409 | 6.38e-24 | LSPKVVTLVE | QESNTNTAPFVNRFTETLNYY LAIFESID      | VTLPRGHKER  |
| 32. | 29889.m003284_Rc_GRAS | 429 | 7.32e-24 | INPNVMVME  | VEANNNSPSFVHRFIEALFFYS AYFDCFD      | ACMERDDPNR  |
| 27. | 29648.m001919_PAT1    | 429 | 7.32e-24 | LNPKLVTVVE | QDVNTNTAPFFPRFVEAYNYYS AVFESLD      | ATLPRESQDR  |
| 15. | 28650.m000189_LISCL   | 529 | 1.44e-23 | INPVIFLHGV | VNGSYNAPFFATRFREALHFH SSSLFDMFE     | AIATREDQER  |
| 12. | 27568.m000253_LISCL   | 608 | 1.44e-23 | MNPDVFITGI | VNGAYNAPFFITRFREAVFH YSTLFDMLE      | TNVPREIPER  |
| 28. | 29949.m000124_PAT1    | 418 | 9.01e-23 | LSPKVVTLVE | QESNTNTAAFFPRFLETLNYY T AMFESID     | VTLSREHKER  |
| 24. | 27529.m000047_PAT1    | 413 | 9.01e-23 | LSPKVVTLIE | QESNTNTKPFLLPRFKETLEY YNAMFESID     | AGSSRDDKQR  |
| 17. | 28650.m000191_LISCL   | 632 | 9.01e-23 | MSPDIFIHAI | VNGSYSAPFFVTRFRFRESLF HFSALSALFDMFD | TNMSREDQMR  |
| 26. | 28166.m001040_PAT1    | 330 | 1.92e-22 | LNPKVVTLVE | QESNTNTTPFLTRFMETLDFY LAMFESID      | VRLPRERKDR  |
| 18. | 29767.m000200_LISCL   | 608 | 6.54e-22 | INPNIFILGI | INGAYSAPFFITRFREALHFH SSSLFDMLE     | SIVPREDMER  |
| 33. | 29889.m003285_Rc_GRAS | 444 | 7.55e-21 | LNPSITVVTE | PEYNSTSSSFVNRFIEALFYFS AYFDCLE      | SCMKDNSNRM  |
| 42. | 30073.m002204_SCR     | 683 | 1.18e-20 | RLAPKVVTVV | EQDLSHAGSFLGRFVEAIHYYS ALSALFDSL G  | ASYGEESEER  |
| 41. | 29872.m000537_SCR     | 309 | 1.18e-20 | LLRPKLITTA | EQDLSHAGSFLGRFVEALHYYS ALSALFDAL G  | DGLGIDSVER  |
| 38. | 30131.m007244_SCL3    | 339 | 2.05e-20 | LSPKLMVITE | QESNHNGFTLMERVTEALNFY AALFDCLE      | STVSRPSIER  |
| 36. | 29790.m000809_SCL3    | 285 | 2.05e-20 | MSPRLLFLVE | QEADHNLNRLPDRFIEGLHYYS AVFDSID      | ATLVGNLGSE  |

Table S2. Cont.

|     |                       |     |          |            |                                 |             |
|-----|-----------------------|-----|----------|------------|---------------------------------|-------------|
| 37. | 30024.m001746_SCL3    | 318 | 7.14e-19 | LSPKLMVVME | QDSNHNGSSLMERLLEALYSYAALFDCLE   | STVSRSTLER  |
| 40. | 28492.m000479_SCR     | 382 | 1.17e-18 | ELSPRIMTLV | EQDISHGGSFLDRFVGLHYYSTLFDSLGL   | AFLPCDDSSR  |
| 19. | 29728.m000844_Os19    | 322 | 1.17e-18 | LNPSIVILVE | QEGSRSPRSFLSRFMESLHYFAAMYDSL    | DCLPLESSER  |
| 39. | 29634.m002156_SCL4/7  | 475 | 1.43e-18 | LNPEIVTLGE | YEASLNQIGYENRFKNALRYYS AVFESLE  | PNLSRDSTER  |
| 29. | 30169.m006225_PAT1    | 484 | 7.25e-18 | LAPRVVTLVE | QEMNTNTAPFMARVNEGSSYYGALFESIE   | STVQRDHTE   |
| 5.  | 30190.m011131_DLT     | 516 | 1.83e-17 | TSPTIVLMAE | QEA EHNATNLEARVCNSLKYYS AIFDSIN | TSLPLDSLVR  |
| 9.  | 29908.m006159_HAM     | 355 | 2.88e-17 | SPRLVTLVEE | EVGPGVDGGFVGRFMDSLYHYSALYDSLE   | AGFPMQSRAR  |
| 4.  | 30170.m013590_DELLA   | 320 | 3.07e-15 | IEPEIFTIIE | QESDNNQDQGSYRFNECINYSFLESSE     | GSTNCLDTYI  |
| 6.  | 29646.m001070_HAM     | 414 | 1.04e-12 | PEVVVVVDNE | GWGESEPA SFRNFVNGLEFYSMIFESLD   | AAAAGGGGEWA |
| 30. | 29889.m003281_Rc_GRAS | 307 | 1.19e-12 | LNPCVMVHIE | PVLNHSSPIFIDSFLEVLLFYSTCFD GVE  | GCIDQCDPNR  |
| 44. | 29661.m000923_SHR     | 382 | 4.24e-12 | IITIVEEEAD | LDVGIDGLDFVRGFQECLELRWFRVYFESLE | ESFSRTSNER  |
| 46. | 30156.m001710_SHR     | 310 | 1.19e-11 | LNPCITVIVD | EDSDL DAPDLTSRITTCFNYLWIPF DALE | TFLPTDSCQR  |
| 8.  | 29820.m000986_HAM     | 381 | 1.19e-11 | GILTFGDGDA | WETVRDCSGFASYFEGNLMHYQALLESIE   | MNFPIHLAEA  |
| 11. | 30174.m008828_HAM     | 607 | 1.97e-11 | LSPKIVVSLD | RGCDRTDLPFAHHINHSIQSYSGLLESLE   | AVNMNIDALQ  |
| 43. | 29661.m000901_SHR     | 310 | 6.37e-11 | LDPTIVVLVD | EDADLTSNNLVCR LRS AFNYLWIPYDTVD | TFLPRGSKQR  |
| 7.  | 29820.m000985_HAM     | 389 | 1.97e-10 | GIVTFGEGIG | HETLSNCDGFGSFFERYMEHYEGLLESIE   | WGFPIHLAEA  |

Motif 4

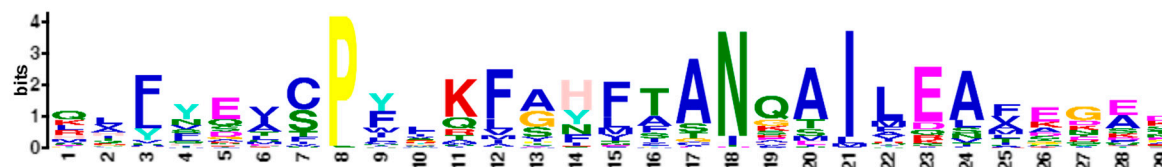

|     |                      |     |          |            |                               |             |
|-----|----------------------|-----|----------|------------|-------------------------------|-------------|
| 2.  | 29692.m000540_DELLA  | 311 | 7.94e-34 | IDHSLSDILQ | MHFYETCPYLKFAHFTANQAILEAFEGKK | RVHVIDFSMN  |
| 3.  | 29807.m000482_DELLA  | 225 | 3.83e-31 | ASAYENEFY  | HHFYEACPYLKFAHFTANQAILEAFDGH  | CVHVVDNLM   |
| 1.  | 28677.m000055_DELLA  | 271 | 4.98e-30 | LDPSYSDTLE | MHFYETCPYLKFAHFTANQAILEAFGTAN | RVHVIDFGLK  |
| 23. | 30131.m007029_Os43   | 404 | 1.81e-26 | SNSMEILKIY | QIVYQACPYIKFAHFTANQAIFEAFEAEE | RVHVIDLDIL  |
| 39. | 29634.m002156_SCL4/7 | 314 | 2.64e-25 | SSEEDFTLSY | KALNDACPYSKFAHLTANQAILEATEGAS | KIHIVDFGIV  |
| 28. | 29949.m000124_PAT1   | 255 | 1.10e-24 | PASADLLSYM | HILYEVCPYFKFGYMSANGAIAEAMKDEN | KVHIIDFQIG  |
| 19. | 29728.m000844_Os19   | 159 | 1.50e-24 | PTSEEEFLAF | THLYRVSPYYQFAHFTANQAILEAFEKEE | EEESDSKSRI  |
| 25. | 27613.m000642_PAT1   | 246 | 2.04e-24 | PASAELLSYM | HILYEVCPYFKFGYMSANGAIAEAMKDES | RVHIIDFQIA  |
| 42. | 30073.m002204_SCR    | 533 | 9.18e-24 | THTQKMASAF | QVFNGISPFVKFSHTANQAIQEAFERED  | RVHIIDL DIM |
| 9.  | 29908.m006159_HAM    | 190 | 3.39e-23 | HHQADTLAAF | QLLDMSPYVKFGHFTANQAILEAVSQDK  | RIHIVDYDIM  |

Table S2. Cont.

|     |                       |     |          |             |                                |             |
|-----|-----------------------|-----|----------|-------------|--------------------------------|-------------|
| 20. | 29929.m004746_Os4     | 217 | 6.99e-21 | SFTA EKDEAL | RLVYEICPQIQFGYFVANATILEAFEGES  | SIHVVDLGMT  |
| 41. | 29872.m000537_SCR     | 158 | 7.92e-21 | TQSQKIFNAF  | QSYNSISPLIKFSHFTANQAIQALDGED   | RVHVIDFDIM  |
| 21. | 30147.m013794_Os4     | 237 | 1.15e-20 | IASDKKEEAL  | SLVYEICPHIQFGHFVANSSILEAFEGES  | FVHVVDLGMT  |
| 27. | 29648.m001919_PAT1    | 266 | 2.39e-20 | PPSSDRLAAM  | QILFEICPCFKFGFMAANGAMIESFKGEK  | GVHIIDFDIN  |
| 38. | 30131.m007244_SCL3    | 126 | 5.51e-20 | YLVSEEILVQ  | RLFFELFPFLKLAYVITNQAIVEAMEGEK  | MVHIIDLNSF  |
| 40. | 28492.m000479_SCR     | 232 | 8.83e-20 | INHKTVHSAF  | QVFNNVSPFIKFAHFISNQEILEAFQRRD  | RVHIIDLDIM  |
| 37. | 30024.m001746_SCL3    | 106 | 9.92e-20 | TLVSEEILVR  | KLFFEMFPFLKVG VITNQAIIEAMEGEK  | MVHIIDLNAV  |
| 11. | 30174.m008828_HAM     | 451 | 3.92e-19 | CNLILKIGAY  | KSFSEISPILQFSNFTCNQALLEACEGSD  | RIHIVDFDIG  |
| 44. | 29661.m000923_SHR     | 205 | 7.66e-19 | CSFESTRKMV  | LKFQEVSPWTTFGHVSCNGAIMEAFEGES  | KLHIIDISNT  |
| 22. | 30169.m006306_Os4     | 250 | 1.33e-18 | ITREEKMEAF  | QLLYQTTTPYVAFGFMAANEAICEAARGKD | ALHVIDLGMD  |
| 7.  | 29820.m000985_HAM     | 207 | 7.33e-18 | ESFKNFDKAF  | EVFYQIFPYGMVAHFTANSAILEAKPRDA  | EILHVVD FDI |
| 10. | 29916.m000544_HAM     | 505 | 8.13e-18 | FDVIFKLGAY  | KVFSEVSPLIQFVNFTCNQALLEALSEAD  | RIHIIDFDIG  |
| 14. | 28650.m000187_LISCL   | 391 | 1.11e-17 | TPVSDILKAY  | QVYVKACPFKRMSNFFANQTIFKLAEKAT  | RLHIIDFGVL  |
| 15. | 28650.m000189_LISCL   | 366 | 3.08e-17 | TNTADILKAY  | QLYVSVCPFRKMSNFFTNRITITKAVEKAT | RLHIIDFGIS  |
| 8.  | 29820.m000986_HAM     | 204 | 6.82e-17 | ESSNNFEAAF  | RAFYQIFPNGRIAHFAANSAILEAMPADA  | EMIHIVDFDM  |
| 24. | 27529.m000047_PAT1    | 250 | 1.80e-16 | PVSSDLMTYM  | GILFKICPYWRFAYTSANVIIREAVEYEP  | RIHIIDFQIA  |
| 16. | 28650.m000190_LISCL   | 519 | 5.61e-16 | RTAADILRAY  | KTHLHACPFKLSILFANKMIMHAAEKAT   | TLHIVDFGVS  |
| 29. | 30169.m006225_PAT1    | 318 | 7.41e-16 | LFAKEHIAST  | QLLYELSPCFKLGMAANLAILQSTVDQP   | NSGTGFHVID  |
| 43. | 29661.m000901_SHR     | 116 | 1.07e-15 | DAHKFSVIEL  | ASFVDLTPWHRFGFTAANASILEAIEGFS  | VVHIVDLSLT  |
| 4.  | 30170.m013590_DELLA   | 162 | 2.65e-15 | FDYSYLNDIQ  | RYFYKEWSYVKA AHLTANREIFETFAGKK | HIHVIDFFIN  |
| 12. | 27568.m000253_LISCL   | 445 | 5.37e-15 | TTAADVLKAH  | HLFLAACPFKLSNFFSNKTIMNIAQNAT   | TLHIIDFGIL  |
| 5.  | 30190.m011131_DLT     | 361 | 5.37e-15 | RVDDDSGTAW  | RLLNQVNPIPKFIHFTENEIFLRAFEGKD  | KVHIIDFDIK  |
| 33. | 29889.m003285_Rc_GRAS | 288 | 8.30e-15 | EAIMAPSSTI  | LASYQEV PFSQVAHFAGIQAIVENVTDAK | RIHVIDLGIR  |
| 31. | 29889.m003282_Rc_GRAS | 220 | 2.13e-14 | SLVIIPNSI   | QACFEGIPFYQAAHLTGIKAIENVAEAN   | RSHLLKITAV  |
| 32. | 29889.m003284_Rc_GRAS | 273 | 3.51e-14 | PVDPNHNAAS  | LACHQKIPFIQVARFTAIQEIVENVARAK  | RIHIIDLEIR  |
| 45. | 29706.m001281_SHR     | 242 | 3.82e-14 | IDPKFFQ RSL | LKFYEVSPWFAPNNIANS SILQVLAQEL  | DHKRNLHILD  |
| 13. | 28650.m000186_LISCL   | 366 | 8.00e-14 | TSAAGMLKAY  | HAYTTACPFQTM SHLYANETIMKLAEKTT | RLHIIDFGIL  |
| 18. | 29767.m000200_LISCL   | 446 | 9.41e-14 | TSAANVLKAY  | HLYLAACPFKRLTNFLSNKTIMELSANSA  | SIHIIDFGIL  |
| 17. | 28650.m000191_LISCL   | 469 | 1.79e-13 | LSAADMLKAY  | LAYISACPFNKIAIIFANHNILAVSKNAS  | TLHIIDFGIL  |
| 46. | 30156.m001710_SHR     | 125 | 2.65e-13 | QRRQMSVTEL  | AGYVDLIPWHRFGFCASNSAIFKAIEECP  | KVHILDFSIT  |
| 34. | 29910.m000940_Rc_GRAS | 295 | 2.87e-13 | EAMMTPNPTI  | LASHLET PFCQVAHFAGIQAIVDNVADAK | KIHILDLSLR  |
| 6.  | 29646.m001070_HAM     | 248 | 1.06e-12 | SEVVQTIKAY  | QDFSGISPIPMFNHFPVDQAILETLDDSP  | PFIHVIDFDI  |
| 35. | 30076.m004651_Rc_GRAS | 340 | 4.06e-11 | PDGTSLHLAC  | LSFHQNVPLNQITQLTSIQAIMENIGSAR  | KLQVIDLEIR  |

Table S2. Cont.

Motif 5

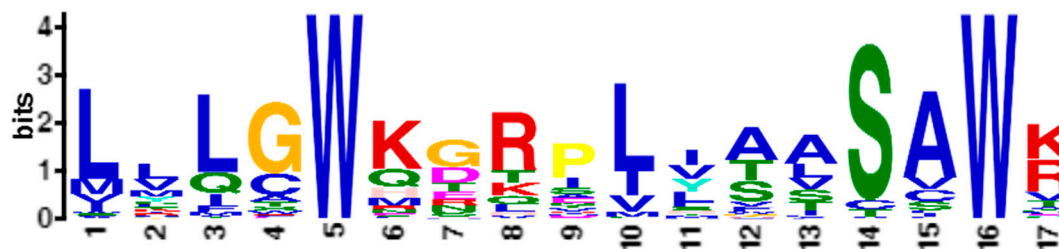

|     |                       |     |          |             |                   |            |
|-----|-----------------------|-----|----------|-------------|-------------------|------------|
| 2.  | 29692.m000540_DELLA   | 583 | 5.23e-18 | GYRVDENNGC  | LMLGWHTRPLIATSAWR | LASKQVVLAQ |
| 18. | 29767.m000200_LISCL   | 722 | 1.79e-17 | NFLINEDGRW  | LLQGWKGRIIYALSAWK | PM         |
| 34. | 29910.m000940_Rc_GRAS | 566 | 3.86e-17 | CFTLDRNGKS  | LVLGWKGTPHLSLAWK  | FISHEKKGVN |
| 21. | 30147.m013794_Os4     | 509 | 1.90e-16 | GYTVVEEKGC  | LVLGWKSKPIVAASCWK | C          |
| 1.  | 28677.m000055_DELLA   | 546 | 1.90e-16 | GYRVEENNGC  | LMLGWHTRPLIATSAWQ | LSDSK      |
| 25. | 27613.m000642_PAT1    | 522 | 2.24e-16 | KYTLERDGA   | LYLGWMNRPLIASCRAW |            |
| 6.  | 29646.m001070_HAM     | 522 | 3.12e-16 | GFYVAKRQAE  | LVLCWHERPLIATSVWK | C          |
| 22. | 30169.m006306_Os4     | 522 | 3.66e-16 | GYTLASDKGC  | LLLGWKGRPIMLASAWK | AHNPVSS    |
| 17. | 28650.m000191_LISCL   | 746 | 6.88e-16 | DFVVDQDQGW  | MLQGWKGRIIYASSAWV | PA         |
| 20. | 29929.m004746_Os4     | 489 | 9.35e-16 | GYTVTEDEKGC | LILGWKSKPIIAASCWK | CC         |
| 23. | 30131.m007029_Os43    | 669 | 1.09e-15 | GYRLTEDEKGC | LLLGWQDRAILAASAWR | C          |
| 15. | 28650.m000189_LISCL   | 642 | 1.96e-15 | DFAVDEDEGHV | MLMGWKGRIIHAISAWK | PIEE       |
| 10. | 29916.m000544_HAM     | 770 | 1.96e-15 | GFHVEKRQAS  | LVLCWQRRDLISASAWR | C          |
| 16. | 28650.m000190_LISCL   | 797 | 2.27e-15 | DFVIDEDNNW  | MLQGWKGRIIYASSCWV | PA         |
| 33. | 29889.m003285_Rc_GRAS | 558 | 3.01e-15 | ACTLSMDGKS  | LLIGWKGTPMHLSLAWK | FI         |
| 4.  | 30170.m013590_DELLA   | 435 | 3.01e-15 | KCTIEENNGC  | WMLGWRTRPLIAISAWR | ADNRILISDE |
| 3.  | 29807.m000482_DELLA   | 498 | 3.01e-15 | GYCVEENDGC  | LTLGWHSRPLIAASAWQ | AVPDIGSPLG |
| 11. | 30174.m008828_HAM     | 716 | 5.24e-15 | GFHVEKRQST  | LVLCWQRKELISASAWR | C          |
| 42. | 30073.m002204_SCR     | 796 | 6.87e-15 | GYTLVEDNGT  | LKLGWKDLCLLTASAWR | PFHATATAAA |
| 41. | 29872.m000537_SCR     | 423 | 7.86e-15 | YTLVEEENGC  | LKLGWKDLSLLTASAWK | PSD        |
| 37. | 30024.m001746_SCL3    | 432 | 1.02e-14 | GYRIKDENGK  | VVICWQDRPLFSLSAWR | CKK        |
| 35. | 30076.m004651_Rc_GRAS | 611 | 1.33e-14 | SCSLDKNGKC  | LIVGWKGTPHLSLAWK  | FCGDRLGRRF |
| 26. | 28166.m001040_PAT1    | 443 | 1.33e-14 | HYTLLEKDGA  | MLLGWKNRNLVSASAWY |            |
| 19. | 29728.m000844_Os19    | 453 | 1.33e-14 | RVFERDEGKT  | ISLGWQDRCLLTASAWR | CV         |

Table S2. Cont.

|     |                       |     |          |            |                    |            |
|-----|-----------------------|-----|----------|------------|--------------------|------------|
| 36. | 29790.m000809_SCL3    | 399 | 1.71e-14 | GYKTVSERWS | LMICWHERPIYAVTAWT  | C          |
| 44. | 29661.m000923_SHR     | 495 | 2.21e-14 | WSMTQSGHAG | IFLCWKEQPVVWASAWK  | P          |
| 40. | 28492.m000479_SCR     | 498 | 3.20e-14 | GYSLAQGEA  | LRLGWKDTSLFTASAWT  | SLASR      |
| 13. | 28650.m000186_LISCL   | 643 | 4.60e-14 | NFIVDEDSQW | MLQGWKGRIIYALAVWK  | PVHD       |
| 38. | 30131.m007244_SCL3    | 453 | 5.18e-14 | GYKIKEENG  | SVICWQDRPLFSVSAWR  | FRRYD      |
| 14. | 28650.m000187_LISCL   | 668 | 6.56e-14 | DFVVDENGRW | MLQGWKGRVISALSVWK  | PVQD       |
| 12. | 27568.m000253_LISCL   | 722 | 1.04e-13 | DFVIDEDSRW | LLQGWKGRIVYALSSWE  | PDH        |
| 27. | 29648.m001919_PAT1    | 543 | 2.54e-13 | RYKLKEEMGA | LLFGWEDKSLIVASAWR  |            |
| 30. | 29889.m003281_Rc_GRAS | 421 | 4.83e-13 | SCLLVRNGKC | LMTGWKETPLLSLAWN   | FQQEHSKNC  |
| 29. | 30169.m006225_PAT1    | 599 | 1.63e-12 | GFTVKEDNGG | VCFGWMGKTLTVASAWR  |            |
| 24. | 27529.m000047_PAT1    | 526 | 3.85e-12 | RYGLQEKDGA | LYLWWMNTAMSSSSAWR  |            |
| 43. | 29661.m000901_SHR     | 422 | 6.69e-12 | GWGLKKEEDD | LVLTWKGHNVVVFATAWM | PT         |
| 5.  | 30190.m011131_DLT     | 631 | 7.32e-12 | RVKERQDRAA | LTLSWLDQPLYTISAWA  | PVDVVGSSSS |
| 9.  | 29908.m006159_HAM     | 467 | 8.01e-12 | YRVEELGCNR | LVLWKSRRLLSASIWT   | SPSSDCDL   |
| 39. | 29634.m002156_SCL4/7  | 592 | 2.09e-11 | YSLVESQPGF | LSLAWNEVPLLVSSWR   |            |
| 46. | 30156.m001710_SHR     | 422 | 2.70e-11 | GWGMKKEEDM | LVLTWKGHNSVFASAWL  | PSCLED     |
| 8.  | 29820.m000986_HAM     | 492 | 3.76e-11 | VRIGGEWNE  | MILEWRGTQLVRVSAWR  | N          |
| 45. | 29706.m001281_SHR     | 524 | 7.18e-11 | EMRTEEKDGC | VGLWVKGQPVSFCSLWR  | LDMKGNDS   |
| 32. | 29889.m003284_Rc_GRAS | 544 | 9.11e-11 | SCTLDVNEKS | LNISWKATPISLSVWK   | FI         |

Motif 6

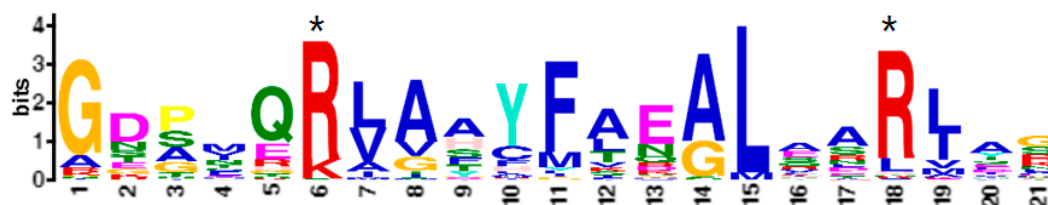

|     |                     |     |          |            |                       |            |
|-----|---------------------|-----|----------|------------|-----------------------|------------|
| 15. | 28650.m000189_LISCL | 322 | 8.57e-22 | KLIRLHASPY | GDANQRLAHYFANALEARLAG | SGKLMPTLFI |
| 14. | 28650.m000187_LISCL | 347 | 8.89e-20 | RQIRQHSSPY | GDGNQRLAHYFANALETLAG  | TGTPAYSPLL |
| 17. | 28650.m000191_LISCL | 425 | 5.87e-19 | KQIRQHSSPF | GDGSQRLAHCFANGLEARLAG | TGAQIYTALS |
| 16. | 28650.m000190_LISCL | 472 | 5.87e-19 | KQIRQHSSPL | GDGSQRLAHCFANGLEARLAG | SVTGMQSFYT |
| 13. | 28650.m000186_LISCL | 322 | 6.91e-19 | RQIKQYSSPF | GDGNQRLAHFFANGLEARLAG | TGTPGYAPAV |
| 37. | 30024.m001746_SCL3  | 61  | 8.13e-19 | GQISQLASAE | GDTMQRIAAYFTEALAHRIIK | AWPGVHRALN |
| 23. | 30131.m007029_Os43  | 355 | 9.54e-19 | HHLNRVVTPL | GDSMQRVASCFTEALSARLAA | TLTTQPSNTA |
| 18. | 29767.m000200_LISCL | 402 | 2.44e-18 | KQIRQHSSPF | GDGNQRLAHCFANGLDARLAG | TGSQIYKGLV |



Table S2. Cont.

|     |                       |     |          |            |                        |            |
|-----|-----------------------|-----|----------|------------|------------------------|------------|
| 38. | 30131.m007244_SCL3    | 80  | 3.30e-18 | EHISHLASAD | GDTMQRIAAYFTEALADRILK  | KGWPCLHRAL |
| 28. | 29949.m000124_PAT1    | 211 | 1.55e-16 | DELRQIVSVS | GEPIQRLGAYMLEGLVARLAS  | SGSSIIKSLR |
| 25. | 27613.m000642_PAT1    | 202 | 1.55e-16 | TELKRMVSVS | GEPIQRLGAYMLEGLVARLAS  | SGSSIYRALR |
| 12. | 27568.m000253_LISCL   | 401 | 1.75e-16 | KQIRQNASPT | GDMQRMAMHIFADGLEARMAG  | SGTQIYKAFM |
| 34. | 29910.m000940_Rc_GRAS | 245 | 1.99e-16 | KQCDSISSNT | GNPVQRVVYFAEALHDRIDI   | ETGKTKSKEL |
| 39. | 29634.m002156_SCL4/7  | 272 | 3.25e-16 | IKLRESVCEH | GDPTERVAFYFTEALYSRLCL  | QAEKSLAMFE |
| 19. | 29728.m000844_Os19    | 116 | 5.92e-16 | SELYTSVCLT | GDSVQRVVAYFADGLSARLLT  | RKSPFYEMIM |
| 2.  | 29692.m000540_DELLA   | 274 | 6.66e-16 | KQIGFLAVSQ | AGAMRKVATYFAEALARRIYR  | LYPQSPIDHS |
| 30. | 29889.m003281_Rc_GRAS | 98  | 8.43e-16 | NLCDFLSSNK | GNSVQRVVHYFTKALQDRISQ  | ESETVSSKRS |
| 1.  | 28677.m000055_DELLA   | 234 | 1.19e-15 | KHIGLLAASQ | ASSMRKVATYFAEALARRIYK  | IYPQESLDPS |
| 42. | 30073.m002204_SCR     | 488 | 1.68e-15 | LEISQLSTPY | G TSAQRVAAYFSEAMSARLIN | SCLGIYATLP |
| 35. | 30076.m004651_Rc_GRAS | 293 | 2.36e-15 | SRCEWIASQR | ANPVQRVVYCFEALRERIDK   | ATGRFIPKER |
| 24. | 27529.m000047_PAT1    | 206 | 6.31e-15 | HVLEQMVSVS | GEPIQRLGAYMLEGLRARVEL  | SGSKIYRALK |
| 27. | 29648.m001919_PAT1    | 222 | 1.07e-14 | NELRQMVSQI | GDPSSRIAAYMVEGLAARMAA  | SGKYLYKALK |
| 33. | 29889.m003285_Rc_GRAS | 242 | 1.32e-14 | NQCDSLSSST | GNAVERVVHYFCKALRERIDR  | ETGKSLGKQH |
| 32. | 29889.m003284_Rc_GRAS | 227 | 1.32e-14 | NHCELLSSNI | GNPVQRVVYHFSEALKERIDR  | ETGRFPSIEY |
| 31. | 29889.m003282_Rc_GRAS | 181 | 2.00e-14 | EFCDQSSSNA | GNPVQRVVYFFGALRRRIDQ   | ELGKITSRSL |
| 36. | 29790.m000809_SCL3    | 69  | 2.45e-14 | SEISELSSVS | GDSMQRLAARFASALAIRLVK  | RWPGLYKALN |
| 20. | 29929.m004746_Os4     | 169 | 3.32e-14 | SELRANALVF | GTSFQRVASCVFQGLSDRLTL  | LQPLGAVGVL |
| 6.  | 29646.m001070_HAM     | 206 | 5.45e-14 | RLNHRLQSPV | GKPLQRAAFFKKEALQNLLAG  | SPRTPHTPTS |
| 41. | 29872.m000537_SCR     | 111 | 1.08e-13 | PEISELSSPF | GSSFERVGSYFAHALQARVVS  | SCLGTYSPLT |
| 21. | 30147.m013794_Os4     | 188 | 1.57e-13 | SELRSSALVF | GSSFQRVASCFFQGLADRLSL  | VQPLGTVSLV |
| 9.  | 29908.m006159_HAM     | 139 | 1.73e-13 | RLKELVSPND | GTNMERLAAYFTDALQGLLEG  | HGTSTKHLIH |
| 26. | 28166.m001040_PAT1    | 233 | 2.29e-13 | EKARAASVIS | GEPIQRLGAYLVEGLVARKES  | SGNNIYHALR |
| 22. | 30169.m006306_Os4     | 200 | 8.94e-13 | AQIWASVNP  | GDSLQRVSYCFALGLRSRLSL  | LQNATSNGTF |
| 5.  | 30190.m011131_DLT     | 315 | 9.77e-13 | AKLGELSSPK | GTAVSRLIAYYTEALALRVTR  | LWPHIFHIST |
| 43. | 29661.m000901_SHR     | 66  | 1.16e-12 | WVLNNIAPPD | GDSNQRLTCAFLRALIARAAS  | SGTCKLLAAM |
| 46. | 30156.m001710_SHR     | 80  | 1.27e-12 | WVLNNVASLV | GDPNQRLT SWFLRALISRASK | VCPTAMNFDG |
| 10. | 29916.m000544_HAM     | 459 | 1.51e-12 | ARLNQQLSPI | GKPLHRAAFYFKEALQLLLLM  | NNNPVTSLPP |
| 11. | 30174.m008828_HAM     | 409 | 2.32e-12 | RLNHQLSLSI | GKPHTRAAAFYFKEALQLLHLM | NNTANPSSLS |
| 45. | 29706.m001281_SHR     | 197 | 4.96e-12 | YVLHELASST | GDANHRLAFYGLQALTHHLSS  | SRTSASIGSV |
| 44. | 29661.m000923_SHR     | 158 | 1.54e-11 | WMLNELGSPY | GDIDKKLASYFLQALFSRMTD  | SGERCYRTLA |
| 40. | 28492.m000479_SCR     | 192 | 2.68e-11 | ELTQMSPY   | PSCAERVVAYFAKAMASRVIN  | SWLGICSPLI |
| 29. | 30169.m006225_PAT1    | 278 | 4.26e-11 | TRVSQVSNPR | GNSEQRLMEYMSMALKSRLNS  | ADNPPVAEL  |
| 4.  | 30170.m013590_DELLA   | 126 | 6.72e-11 | ILSQILVNSK | ARATQSMALFAEAMSSRVYR   | LYPQYFDYSY |
| 3.  | 29807.m000482_DELLA   | 184 | 1.16e-9  | MQALLTRVNT | NSGIGKVAGCFIDALSLRIFS  | PVNGVGVAVG |

Table S2. Cont.

|     |                       |     |          | Motif 7     |                               |            |  |  |  |  |  |  |  |  |  |  |  |  |  |  |  |  |
|-----|-----------------------|-----|----------|-------------|-------------------------------|------------|--|--|--|--|--|--|--|--|--|--|--|--|--|--|--|--|
|     |                       |     |          |             |                               |            |  |  |  |  |  |  |  |  |  |  |  |  |  |  |  |  |
| 18. | 29767.m000200_LISCL   | 519 | 5.05e-29 | GIDFPQPGFR  | PAERVEETGRRLATYAKKFNVPFEYNAIA | KKWETIKFEE |  |  |  |  |  |  |  |  |  |  |  |  |  |  |  |  |
| 12. | 27568.m000253_LISCL   | 519 | 4.48e-28 | GIDFPHPGFR  | PAERVEETGHRLSNYAKKFNVPFEFNAIA | QKWDTVQIEQ |  |  |  |  |  |  |  |  |  |  |  |  |  |  |  |  |
| 16. | 28650.m000190_LISCL   | 593 | 8.41e-27 | GIELPQQGFR  | PAERIEETGRRLARYCERFNVPFEYNSIA | AQNWENIRIE |  |  |  |  |  |  |  |  |  |  |  |  |  |  |  |  |
| 15. | 28650.m000189_LISCL   | 440 | 1.33e-26 | GIDYPQPGFR  | PGERVEETGRRLKRLADKLNVPFEYNAIA | QKWETIQGED |  |  |  |  |  |  |  |  |  |  |  |  |  |  |  |  |
| 17. | 28650.m000191_LISCL   | 543 | 4.97e-26 | GIELPQSGFR  | PGERVQETGRRLAKYCELHKVPFEYNAIA | KKWETIQIDD |  |  |  |  |  |  |  |  |  |  |  |  |  |  |  |  |
| 14. | 28650.m000187_LISCL   | 465 | 2.62e-25 | GIELPQPGFR  | PAERVEETGRRLQRYCERFNVPFKYHAVA | QKWETIKYED |  |  |  |  |  |  |  |  |  |  |  |  |  |  |  |  |
| 13. | 28650.m000186_LISCL   | 440 | 2.20e-24 | GIEFPQPGFR  | PAERVEETGRRLSKYCERFNVPFEYDSIA | QNWESIYED  |  |  |  |  |  |  |  |  |  |  |  |  |  |  |  |  |
| 5.  | 30190.m011131_DLT     | 429 | 1.03e-21 | SHVRITGIGE  | SKQELNETGDRLAGFAEALNLPFEFHPVV | DRLEDVRLWM |  |  |  |  |  |  |  |  |  |  |  |  |  |  |  |  |
| 27. | 29648.m001919_PAT1    | 340 | 1.02e-20 | GIDDPESVQR  | STGGLKIIGQRLEKLAELKVPFEFHAVA  | SKTSLVSPSM |  |  |  |  |  |  |  |  |  |  |  |  |  |  |  |  |
| 23. | 30131.m007029_Os43    | 472 | 1.54e-20 | PFLRITGVGS  | CIESVRETGRCLTELAHSLHVPFEFHPVA | EELEDLKPHM |  |  |  |  |  |  |  |  |  |  |  |  |  |  |  |  |
| 42. | 30073.m002204_SCR     | 601 | 2.30e-20 | PYVRLTGLGT  | SIEALEATGKRLSDFAQKLGLPFEFFPVA | DKVGNLDPDR |  |  |  |  |  |  |  |  |  |  |  |  |  |  |  |  |
| 32. | 29889.m003284_Rc_GRAS | 343 | 3.43e-20 | LLKISAIGTT  | SKHLIEDTGKRLASFAESMNVFDFRAVM  | VSDMLDLKKE |  |  |  |  |  |  |  |  |  |  |  |  |  |  |  |  |
| 41. | 29872.m000537_SCR     | 226 | 6.60e-20 | RSMRITGFGS  | SSELLESTGRRLADFASSLGLPFEFHPL  | GKIGSVSDIS |  |  |  |  |  |  |  |  |  |  |  |  |  |  |  |  |
| 28. | 29949.m000124_PAT1    | 329 | 4.85e-19 | GIDDSTSAYA  | RGGGPNIVGKRLAKLAESVKVPFEFHAAA | MPNSEVHIKN |  |  |  |  |  |  |  |  |  |  |  |  |  |  |  |  |
| 24. | 27529.m000047_PAT1    | 324 | 4.85e-19 | GVDDPQSAYA  | RGGGLDIVGKRLSSFAESHNVPFQFHDA  | MSGCEVQLEH |  |  |  |  |  |  |  |  |  |  |  |  |  |  |  |  |
| 2.  | 29692.m000540_DELLA   | 383 | 6.17e-19 | LTGIGPPSHD  | NSDHLQEVGWKLAQLAETIHVEFEYRGFV | ANSLADLDAS |  |  |  |  |  |  |  |  |  |  |  |  |  |  |  |  |
| 25. | 27613.m000642_PAT1    | 320 | 1.25e-18 | GIDDSTSAYA  | RGGGLDIVGQRLSRLAESCKVPFEFHAA  | VSGSEIELKN |  |  |  |  |  |  |  |  |  |  |  |  |  |  |  |  |
| 40. | 28492.m000479_SCR     | 300 | 1.58e-18 | PHIRMTGMGT  | SMDLLVETGKQLSNFAKRLGLSFEFHPIA | KKFGEIDVSM |  |  |  |  |  |  |  |  |  |  |  |  |  |  |  |  |
| 1.  | 28677.m000055_DELLA   | 343 | 2.23e-18 | LTGIGPPQSN  | NTDALQQVGVKLAQLADTIGVEFEFRGFV | ANSLADLQPE |  |  |  |  |  |  |  |  |  |  |  |  |  |  |  |  |
| 38. | 30131.m007244_SCL3    | 194 | 1.05e-16 | PHLRITGIHE  | QKEVLEQMALRLTEAEKLDIPFQFNPI   | SKLEDLDIES |  |  |  |  |  |  |  |  |  |  |  |  |  |  |  |  |
| 4.  | 30170.m013590_DELLA   | 234 | 1.56e-16 | ISGIGFPNHD  | NSDYLSVGVKLAQLAETLNIDFEYRGFL  | AYNLADLDA  |  |  |  |  |  |  |  |  |  |  |  |  |  |  |  |  |
| 33. | 29889.m003285_Rc_GRAS | 358 | 1.90e-16 | LLKITAVGTT  | SKHLIKDTGKRLTSFAESISLPFAFNIVM | VSDMLDLTED |  |  |  |  |  |  |  |  |  |  |  |  |  |  |  |  |
| 35. | 30076.m004651_Rc_GRAS | 411 | 2.31e-16 | LKV TALGLTG | KGKKIEETGRSLESFAKSMNIPFTFKAVY | VSCMKNIKEK |  |  |  |  |  |  |  |  |  |  |  |  |  |  |  |  |
| 37. | 30024.m001746_SCL3    | 174 | 4.53e-16 | PHLRITGIHQ  | QKEVLDQMAHKLSEEAERLDIPFQFNPIV | SKLENLDIEK |  |  |  |  |  |  |  |  |  |  |  |  |  |  |  |  |
| 9.  | 29908.m006159_HAM     | 267 | 4.53e-16 | LSRGGNSGKR  | SIGTVQETGRRLVAFASIGQPFSEHHC   | LDSEDFRPS  |  |  |  |  |  |  |  |  |  |  |  |  |  |  |  |  |
| 39. | 29634.m002156_SCL4/7  | 389 | 7.26e-16 | GIPAPVLGKS  | PAASLLATGNRLGDFAKLLDLNFEFVPI  | TPIQELNESN |  |  |  |  |  |  |  |  |  |  |  |  |  |  |  |  |
| 46. | 30156.m001710_SHR     | 200 | 2.00e-15 | PFTRPQVPPW  | LNVSTEEVGLRLGNFAKSRDVPFEFIVID | DPSSDILCKE |  |  |  |  |  |  |  |  |  |  |  |  |  |  |  |  |

Table S2. Cont.

|     |                       |     |          |                   |                                      |                    |
|-----|-----------------------|-----|----------|-------------------|--------------------------------------|--------------------|
| 34. | 29910.m000940_Rc_GRAS | 365 | 2.19e-15 | <b>HLKITAIGTT</b> | <b>SRELIENTGKRLISFAETMNIASFVKMAL</b> | <b>VSDLLDLKED</b>  |
| 44. | 29661.m000923_SHR     | 291 | 3.13e-15 | <b>GGGGNCGLVS</b> | <b>AQKVMKEIGSRMEKFARLMGVPFKFNVIH</b> | <b>HAGDLCDLNL</b>  |
| 3.  | 29807.m000482_DELLA   | 297 | 8.94e-15 | <b>LTGIGPPSPD</b> | <b>GRDSLREIGVKLAELARSVNVRFARGVA</b>  | <b>ASRLEDVKPW</b>  |
| 20. | 29929.m004746_Os4     | 290 | 1.37e-14 | <b>RCLRITGVGN</b> | <b>SAERLQALGDELDCYARSLGLNFELWVE</b>  | <b>SSLEKCLKSTD</b> |
| 30. | 29889.m003281_Rc_GRAS | 221 | 4.38e-14 | <b>LKISGVGVKA</b> | <b>SRQRIEDAGKSLACFANTLDLPFSFKTII</b> | <b>VASIKDLKKD</b>  |
| 29. | 30169.m006225_PAT1    | 395 | 2.13e-13 | <b>ITAVADNSAE</b> | <b>EKERLKVVGTTLSQLAEQFVSLHFNVVS</b>  | <b>AKLGDLSRES</b>  |
| 43. | 29661.m000901_SHR     | 191 | 1.83e-12 | <b>AGCTEDIPPM</b> | <b>LDLSYEELGCKLINFARSNVIMEFRVVD</b>  | <b>SSYADGFSSL</b>  |
| 21. | 30147.m013794_Os4     | 310 | 2.12e-12 | <b>CRLRITAVGL</b> | <b>CVGRFQTIGDELVEYAKDVGINLEFSVVE</b> | <b>STLENLQPDD</b>  |
| 7.  | 29820.m000985_HAM     | 293 | 3.72e-12 | <b>ITAIKWREEH</b> | <b>PWRKLEETKRRLQNYADSLGLMLHVEEIE</b> | <b>VQNLAREIKR</b>  |
| 36. | 29790.m000809_SCL3    | 182 | 4.91e-12 | <b>PHLKFTCLNT</b> | <b>DKAILDKLGQRLVKEAEASDMAFQFHPLN</b> | <b>ISLRDLTADM</b>  |
| 22. | 30169.m006306_Os4     | 321 | 3.63e-11 | <b>RITGLINDHQ</b> | <b>NLLELEASMKVLAEDASSLGVSLFNMIL</b>  | <b>ESVTPSLLTR</b>  |
| 11. | 30174.m008828_HAM     | 522 | 9.99e-11 | <b>KITAFVSPSH</b> | <b>DEIELGFTQENLRVFAGEINMPFELEILG</b> | <b>LDALNSGSWS</b>  |
| 6.  | 29646.m001070_HAM     | 325 | 9.99e-11 | <b>LRITAVVTED</b> | <b>YAIQTQLIKQCLSQYALELKIRFQIEFVL</b> | <b>TRTFEMVSFK</b>  |
| 10. | 29916.m000544_HAM     | 576 | 2.21e-10 | <b>ITAFASPSTH</b> | <b>HPVEVLLMRENLTQFANEIGISFELDVIN</b> | <b>FDSLEQSCYS</b>  |

Motif 8

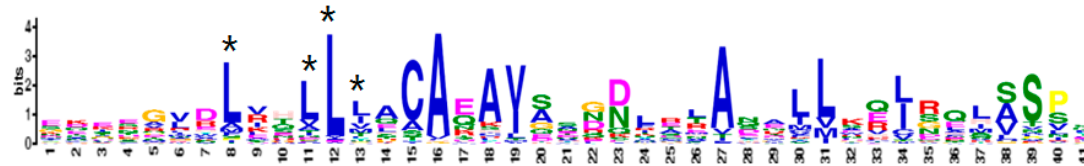

|     |                     |     |          |                   |                                                   |                   |
|-----|---------------------|-----|----------|-------------------|---------------------------------------------------|-------------------|
| 17. | 28650.m000191_LISCL | 384 | 3.82e-34 | <b>GGKARAKRQG</b> | <b>NKKEVVDLRTLILCAQAVSSDDRRTANEILKQIRQHSSPF</b>   | <b>GDGSQRLAHC</b> |
| 18. | 29767.m000200_LISCL | 361 | 2.09e-31 | <b>GGKGRGKKHN</b> | <b>GKKEVVDLRTLILISCAQAVAADDRRSAYEMLKQIRQHSSPF</b> | <b>GDGNQRLAHC</b> |
| 16. | 28650.m000190_LISCL | 431 | 1.12e-30 | <b>GGKTRSKKQS</b> | <b>KKKETVDLRSLILCAQAVSGNDFRTANELVKQIRQHSSPL</b>   | <b>GDGSQRLAHC</b> |
| 2.  | 29692.m000540_DELLA | 233 | 9.91e-28 | <b>PTTRPVVLD</b>  | <b>SQENGIRLVHLLMACAEAVQQNNLTAEALVKQIGFLAVSQ</b>   | <b>AGAMRKVATY</b> |
| 12. | 27568.m000253_LISCL | 360 | 1.40e-27 | <b>SGKGRGKKQK</b> | <b>GKSNVVDLRTLTLCAQAVAADDRRNTNDLLKQIRQNASPT</b>   | <b>GDGMQRMARI</b> |
| 42. | 30073.m002204_SCR   | 447 | 1.04e-26 | <b>EKKEEQRQOK</b> | <b>RDEEGLHLLTLLQCAEAVSADNFEEANKMLLEISQLSTPY</b>   | <b>GTSAQRVAAY</b> |
| 1.  | 28677.m000055_DELLA | 193 | 8.27e-26 | <b>EPNRPMLVID</b> | <b>SQETGVRLVHTLLACAEAIQQDNFKLAEALLKHIGLLAASQ</b>  | <b>ASSMRKVATY</b> |
| 28. | 29949.m000124_PAT1  | 170 | 1.31e-25 | <b>PEMDIWRQMM</b> | <b>EAISRGDLKHVLIACAKAVSDNDLLMAQWLMDELRLQIVSVS</b> | <b>GEPIQRLGAY</b> |
| 15. | 28650.m000189_LISCL | 281 | 3.87e-24 | <b>PNNTRMRRHA</b> | <b>KDKKMFDLSTLLIQCAQATGTGDQRTAYQQLKLRILHASPY</b>  | <b>GDANQRLAHY</b> |
| 14. | 28650.m000187_LISCL | 306 | 4.46e-24 | <b>GRTARGRRQG</b> | <b>NKGEVVDLSTLLAQAQSVSISDHRTATELLRQIRQHSSPY</b>   | <b>GDGNQRLAHY</b> |
| 13. | 28650.m000186_LISCL | 281 | 2.34e-23 | <b>RTARTKKRGS</b> | <b>NKRDMMDLWTVLPQCAQAVANDDQTTAKELLRQIKQYSSPF</b>  | <b>GDGNQRLAHF</b> |
| 22. | 30169.m006306_Os4   | 159 | 1.69e-22 | <b>MVPSMEEVSY</b> | <b>GVDRGLHLVHLLACAEAVGCRDTQLANSVLAQIIVASVNF</b>   | <b>GDSLQRVSYC</b> |
| 20. | 29929.m004746_Os4   | 128 | 1.69e-22 | <b>MISKKNEIKE</b> | <b>EDIDGMKLVQQLIACAEAVACRDKTHASALLSELRANALVF</b>  | <b>GTSFQRVASC</b> |

Table S2. Cont.

|     |                       |     |          |            |                                            |            |
|-----|-----------------------|-----|----------|------------|--------------------------------------------|------------|
| 41. | 29872.m000537_SCR     | 70  | 2.83e-22 | AIKEGEEEE  | EDSTGLRLLGLLLQCAECVAMDNLDEAADLLPEISELSSPF  | GSSFERVGSY |
| 21. | 30147.m013794_Os4     | 147 | 2.83e-22 | SEEGENHGEG | GNTDGMRLVQLLIACAEAVACRDKSHASALLSELRSSALVF  | GSSFQRVASC |
| 23. | 30131.m007029_Os43    | 314 | 2.33e-21 | MVPLPIGPEQ | EQDSGLQLVHLLACAEAVAKEDYMLARKYLHHLNRVVTPL   | GDSMQRVASC |
| 24. | 27529.m000047_PAT1    | 165 | 8.67e-21 | QARWDWTRME | EMIPRLDTRQILFACAQAISDGDISRAAALMHVLEQMVSVS  | GEPIQRLGAY |
| 25. | 27613.m000642_PAT1    | 161 | 9.75e-21 | SEEEKWKFLM | ETVSRDDLKEVLYACAQAIDSNDMLTVEWLMTELKRMVSVS  | GEPIQRLGAY |
| 36. | 29790.m000809_SCL3    | 28  | 1.55e-20 | LSSASPSPYE | TQERGIRLIQLLLKCANDASSGNLHRADACLSEISELSSVS  | GDSMQRLAAR |
| 40. | 28492.m000479_SCR     | 150 | 2.46e-20 | GASNGRGLSR | IDEHGLNLISLLFECVAIVSDNLGEAHRMELLELTQMASPY  | GPSCAERVVA |
| 38. | 30131.m007244_SCL3    | 39  | 3.88e-20 | SPYPWLRELK | SEERGLYLIHLLHACASHVAAGSVENANICLEHISHLASAD  | GDTMQRIAAY |
| 43. | 29661.m000901_SHR     | 25  | 3.53e-19 | GFPTSKALGN | NFGDANCMEQLLVHCANAIESNDATLAQQILWVLNNIAPPD  | GDSNQRLTCA |
| 27. | 29648.m001919_PAT1    | 181 | 3.94e-19 | SSSTSSNKEV | SQLSPRAPKRLLECANALAEADNIEAADALINELRQMVSQI  | GDPSSRIAAY |
| 35. | 30076.m004651_Rc_GRAS | 252 | 5.42e-19 | FGYALSGLSE | EETRDVELAHLAAAIAEKVGYQQFDRASRLSRCEWIASQR   | ANPVQRVVYC |
| 37. | 30024.m001746_SCL3    | 20  | 1.02e-18 | SPYPWLRELK | SEERGLYLIHLLLTGCGNHVAAGSLENAEIALGQISQLASAE | GDTMQRIAAY |
| 45. | 29706.m001281_SHR     | 156 | 2.88e-18 | KGAANNANS  | NNKEGRWAEDLLNPCAAAVSTGNLSRVQHLLYVLHELASST  | GDANHRLAFY |
| 32. | 29889.m003284_Rc_GRAS | 186 | 4.80e-18 | FGLFFSDLSD | DESRNVELVELLLASAEKVGYYQFERASRLLNHCELLSSNI  | GNPVQRVVYH |
| 5.  | 30190.m011131_DLT     | 274 | 9.68e-18 | TEEAAGANHQ | EYQAYELVSLTACVEAIGSKNMAVINHCIAKLGELSSPK    | GTAVSRLIAY |
| 33. | 29889.m003285_Rc_GRAS | 201 | 3.14e-17 | FDLSFGLSV  | DEAKKVELAELLLSAEKVGNQYERASILLNQCDRLSSST    | GNAVERVVHY |
| 19. | 29728.m000844_Os19    | 75  | 2.74e-16 | KPDQKKKGVV | EDGKGLHLIHLITATAVDENNVATALENLSELYTSVCLT    | GDSVQRVVAY |
| 46. | 30156.m001710_SHR     | 39  | 6.22e-16 | SLSGALRGCL | GSLDGACIEKLLHLCASALESNDGTLAQQVMWVLNNVASLV  | GDPNQRLTSW |
| 10. | 29916.m000544_HAM     | 418 | 1.16e-15 | EVGGGHQQQQ | QAQHQHALLDQLYKAAELVGTGNFSHAQGILARLNQQLSPI  | GKPLHRAAFY |
| 30. | 29889.m003281_Rc_GRAS | 57  | 1.39e-15 | FDGSQFGLSG | EEIKDVELSLLLASAHRVGNRQFDHASKLLNLCDLSSNK    | GNSVQRVVHY |
| 3.  | 29807.m000482_DELLA   | 141 | 1.65e-15 | QNQLRVVTAT | EEDSAIRLVHLLMTCAESIQRGDLSLAGSLVEDMQALLTRV  | NTNSGIGKVA |
| 34. | 29910.m000940_Rc_GRAS | 204 | 1.81e-15 | FDLYFGLSD  | EDAKHVELAESLLASAERIGNQYDSASRLKQCDSSSNT     | GNPVQRVVYY |
| 44. | 29661.m000923_SHR     | 117 | 7.80e-15 | FSFSPSHDLN | FDSSRWATDILLETARAIADKNSARVQQLMWMLNELGSPY   | GIDDKKLASY |
| 26. | 28166.m001040_PAT1    | 192 | 1.19e-14 | YHKGIEETGL | QSIPDNLKQLLIACAKALSENINEFDRLIEKARAAVSIS    | GEPIQRLGAY |
| 31. | 29889.m003282_Rc_GRAS | 140 | 1.16e-13 | AGQGLSTEEI | KRQNMWSSLNFFLASAEKVSNGKFDRASRLLEFCQSSSNA   | GNPVQRVVYY |
| 7.  | 29820.m000985_HAM     | 132 | 1.85e-13 | QSLIMPKECM | GISNLFSLTNLAMAYAEATENKQAALAEVIMRRIGEKVSPI  | SGIKERLLYY |
| 29. | 30169.m006225_PAT1    | 237 | 3.43e-13 | PTSSSSSTSV | TTPLPNYSKHTLVEAASAIYDGKTEVASEILTRVSQVSNPR  | GNSEQLRMEY |
| 6.  | 29646.m001070_HAM     | 164 | 3.44e-12 | SLDLSHNIGN | WSNFGFDLIQELIRAADCIDSSEIQLANVILDRNLHRLQSP  | VGKPLQRAAF |
| 11. | 30174.m008828_HAM     | 367 | 9.98e-12 | KQKIMTDELA | AQQLQQAIIINPICQAAELIETGNPALAQGILARLNHQLSLS | IGKPHTRAAF |
| 4.  | 30170.m013590_DELLA   | 264 | 1.75e-8  | IDFEYRGFLA | YNLADLDAAMLELRTHEAIAVNAVVFALHKLLARPGDIHKLL | SMVKHIEPEI |

Table S2. Cont.

|     |                       |     |          | Motif 9    |                        |            |  |  |  |  |  |  |  |  |  |  |  |  |  |  |  |
|-----|-----------------------|-----|----------|------------|------------------------|------------|--|--|--|--|--|--|--|--|--|--|--|--|--|--|--|
|     |                       |     |          |            |                        |            |  |  |  |  |  |  |  |  |  |  |  |  |  |  |  |
| 26. | 28166.m001040_PAT1    | 309 | 4.58e-21 | HSDESVDVSN | PRDGLLRMIKSLNPKVVTLVE  | QESNTNTTPF |  |  |  |  |  |  |  |  |  |  |  |  |  |  |  |
| 28. | 29949.m000124_PAT1    | 397 | 1.94e-20 | LPDESVSTQN | HRDRLRLVKLSLSPKVVTLVE  | QESNTNTAAF |  |  |  |  |  |  |  |  |  |  |  |  |  |  |  |
| 25. | 27613.m000642_PAT1    | 388 | 1.94e-20 | MPDESVGTQN | HRDRLRLVKLSLSPKVVTLVE  | QESNTNTAPF |  |  |  |  |  |  |  |  |  |  |  |  |  |  |  |
| 24. | 27529.m000047_PAT1    | 392 | 2.05e-18 | MPDESVSTWN | HRDRLRLVKLSLSPKVVTLIE  | QESNTNTKPF |  |  |  |  |  |  |  |  |  |  |  |  |  |  |  |
| 27. | 29648.m001919_PAT1    | 408 | 4.94e-18 | MPDESVSTVN | ERDQLLRMVKSLNPKLVTVVE  | QDVNTNTAPF |  |  |  |  |  |  |  |  |  |  |  |  |  |  |  |
| 3.  | 29807.m000482_DELLA   | 366 | 3.50e-17 | LLGSDPNRNL | SIDMVLNWRNLPKIMTVVE    | QEANHNQPGF |  |  |  |  |  |  |  |  |  |  |  |  |  |  |  |
| 2.  | 29692.m000540_DELLA   | 450 | 8.14e-16 | ELHKLLARPG | AIDKVLVSVKQMKPEIVTIVE  | QEANHNGPVF |  |  |  |  |  |  |  |  |  |  |  |  |  |  |  |
| 29. | 30169.m006225_PAT1    | 463 | 2.58e-15 | MPDESVSTEN | PRDELLRRVKGLAPRVVTLVE  | QEMNTNTAPF |  |  |  |  |  |  |  |  |  |  |  |  |  |  |  |
| 1.  | 28677.m000055_DELLA   | 410 | 8.60e-15 | ELHRLLARPG | GMEKVLSSIKAMKPKIVTVVE  | QEASHNGPVF |  |  |  |  |  |  |  |  |  |  |  |  |  |  |  |
| 17. | 28650.m000191_LISCL   | 611 | 1.91e-14 | LLDETVVNS  | PRNAVLNLRKMSPDIFIHAI   | VNGSYSAPFF |  |  |  |  |  |  |  |  |  |  |  |  |  |  |  |
| 14. | 28650.m000187_LISCL   | 533 | 2.98e-14 | LPDDTVVANS | ARDAVLKLRKIRPDIFIHGV   | INGTYNAPFF |  |  |  |  |  |  |  |  |  |  |  |  |  |  |  |
| 15. | 28650.m000189_LISCL   | 508 | 3.70e-14 | LPDDTIVLDS | PRDAVLRLIKSNPVIFLHG    | VNGSYNAPFF |  |  |  |  |  |  |  |  |  |  |  |  |  |  |  |
| 18. | 29767.m000200_LISCL   | 587 | 4.58e-14 | LLDETVVDS  | PKDIVLRLVKKINPNIFILGI  | INGAYSAPFF |  |  |  |  |  |  |  |  |  |  |  |  |  |  |  |
| 39. | 29634.m002156_SCL4/7  | 454 | 5.10e-14 | LYNLLDETYG | AVETALKMAKSLNPEIVTLGE  | YEASLNQIGY |  |  |  |  |  |  |  |  |  |  |  |  |  |  |  |
| 46. | 30156.m001710_SHR     | 289 | 2.13e-13 | EQKCRAQDSS | LRDTFLHSIKILNPCITVIVD  | EDSDLDAPDL |  |  |  |  |  |  |  |  |  |  |  |  |  |  |  |
| 37. | 30024.m001746_SCL3    | 297 | 2.13e-13 | SSPLSSTASV | KMDYFLNLTWLSLSPKLMVVME | QDSNHNGSSL |  |  |  |  |  |  |  |  |  |  |  |  |  |  |  |
| 19. | 29728.m000844_Os19    | 301 | 2.85e-13 | SHLNTLNDFL | KIPDTLKSISHLNPSIVILVE  | QEGSRSPRSF |  |  |  |  |  |  |  |  |  |  |  |  |  |  |  |
| 13. | 28650.m000186_LISCL   | 508 | 5.05e-13 | IPDDTMVVNS | MRDSILKLMRRINPDIFIHGV  | VNGTYNAPFF |  |  |  |  |  |  |  |  |  |  |  |  |  |  |  |
| 34. | 29910.m000940_Rc_GRAS | 430 | 6.67e-13 | LPRNLISLPN | RLDSMMRMKIKNVNPNVIVVAE | VEANHNSPTF |  |  |  |  |  |  |  |  |  |  |  |  |  |  |  |
| 16. | 28650.m000190_LISCL   | 662 | 6.67e-13 | LLDEIVEVDC | PRNAVLDLIRKIKPNIVVHCI  | INGSYNAPFF |  |  |  |  |  |  |  |  |  |  |  |  |  |  |  |
| 10. | 29916.m000544_HAM     | 641 | 1.05e-12 | PVWSASNQPA | ALPSLLRFVKQLSPKIVVSLD  | RGDRDLDLPP |  |  |  |  |  |  |  |  |  |  |  |  |  |  |  |
| 12. | 27568.m000253_LISCL   | 587 | 1.26e-12 | LLDETVVDES | PRTNVNLNIREMNPVDFITGI  | VNGAYNAPFF |  |  |  |  |  |  |  |  |  |  |  |  |  |  |  |
| 43. | 29661.m000901_SHR     | 289 | 2.33e-12 | ESSSSSSMSS | LRTMFLKSLRSLDPTIVVLVD  | EDADLTSNNL |  |  |  |  |  |  |  |  |  |  |  |  |  |  |  |
| 11. | 30174.m008828_HAM     | 586 | 2.33e-12 | PIAPFSNYP  | SLPVVLRVFKQLSPKIVVSLD  | RGCDRTDLPP |  |  |  |  |  |  |  |  |  |  |  |  |  |  |  |
| 23. | 30131.m007029_Os43    | 534 | 2.54e-12 | VNRLHHVPGN | CLPNLLAMIRDQAPNIVTIVE  | KEASHNGPYF |  |  |  |  |  |  |  |  |  |  |  |  |  |  |  |
| 32. | 29889.m003284_Rc_GRAS | 408 | 4.22e-12 | FLMNLLVAPN | RLESIMGMLRNINPNVMVVME  | VEANNNSPSF |  |  |  |  |  |  |  |  |  |  |  |  |  |  |  |



Table S2. Cont.

|     |                       |     |          |            |                       |             |
|-----|-----------------------|-----|----------|------------|-----------------------|-------------|
| 35. | 30076.m004651_Rc_GRAS | 476 | 6.37e-12 | FLRTLISPE  | CLENLMRVIKNLKPSIMVINE | IEANHNSPNF  |
| 22. | 30169.m006306_Os4     | 388 | 6.92e-12 | LHKFVKESRG | SLKAILQAIKRLSPTLLTVVE | QDANHNGPFF  |
| 30. | 29889.m003281_Rc_GRAS | 286 | 7.50e-12 | ILRFIKAQOD | CLQCLLTVLRKLNPCVMVHIE | PVLNHSSPIF  |
| 33. | 29889.m003285_Rc_GRAS | 423 | 8.13e-12 | LLRSLISLPD | RLNSVMKVIRILNPSITVVTE | PEYNSTSSSF  |
| 45. | 29706.m001281_SHR     | 394 | 1.21e-11 | LHHLNHNNPD | ERTEFLKVLRSLEPKGVILSE | NNTDRCQICG  |
| 21. | 30147.m013794_Os4     | 375 | 1.31e-11 | LHCVVKESRG | ALNSVLQTIHALSPKILALVE | QDSSHNGPFF  |
| 38. | 30131.m007244_SCL3    | 318 | 1.66e-11 | LSPLSLAPSP | KMGSFNLALWGLSPKLMVITE | QESNHNGFTL  |
| 20. | 29929.m004746_Os4     | 355 | 2.84e-11 | LHCAVKESRG | ALNTVLQILHELSPKLLILVE | QDSGHNGPFF  |
| 5.  | 30190.m011131_DLT     | 495 | 2.84e-11 | HKTLYDGNNG | ALRDFLGLIRSTSPTIVLMAE | QEAEHNATNL  |
| 44. | 29661.m000923_SHR     | 357 | 3.83e-11 | SLHSVTTVAN | RRDYIISNFRRLQPRIITIVE | EEADLDVGDID |
| 36. | 29790.m000809_SCL3    | 264 | 9.88e-11 | NRSTCIKDKC | QMSDFLAMVRSMSPRLLFLVE | QEADHNLNRL  |
| 9.  | 29908.m006159_HAM     | 333 | 1.22e-10 | LPHFSYRAPD | SVASFSLGSKTLPRLVTLVE  | EEVGPVGDGG  |
| 6.  | 29646.m001070_HAM     | 391 | 1.61e-10 | TFRRLGSSNN | NINSFVTDIRRVSPVVVVVD  | NEGWGESEPA  |

Motif 10

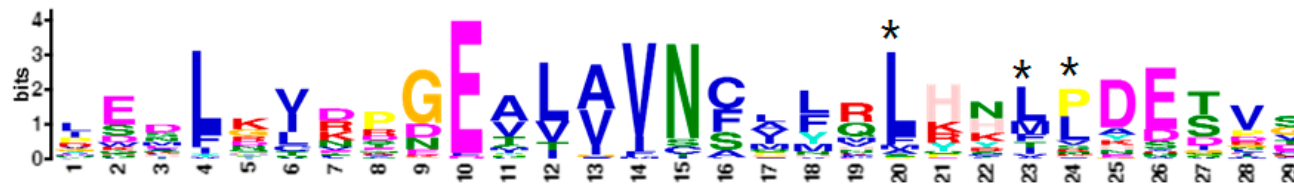

|     |                      |     |          |            |                                |            |
|-----|----------------------|-----|----------|------------|--------------------------------|------------|
| 28. | 29949.m000124_PAT1   | 365 | 1.05e-25 | AAAMPNSEVH | IKNLGVEPGEALAVNFAFMLHHLDPDESVS | TQNHRDRLLR |
| 24. | 27529.m000047_PAT1   | 360 | 2.34e-25 | DAAMSGCEVQ | LEHLCVRPGEAVVVNFPYVLHHPDESVS   | TWNHRDRLLR |
| 27. | 29648.m001919_PAT1   | 376 | 4.38e-25 | AVASKTSLVS | PSMLDCKAGEALVVNFAFQLHHPDESVS   | TVNERDQLLR |
| 25. | 27613.m000642_PAT1   | 356 | 5.96e-25 | AAGVSGSEIE | LKNLGIKIRPGEALAINFALMLHHPDESVD | TQNHRDRLLR |
| 12. | 27568.m000253_LISCL  | 555 | 1.71e-24 | AIAQKWDTVQ | IEQLKIDKNEVLVVNCLYRLRNLLDETIV  | VESPRTNVLN |
| 14. | 28650.m000187_LISCL  | 501 | 1.28e-23 | AVAQKWETIK | YEDLNIDRGEMTVVNCLYRLRNLPDDTVV  | ANSARDAVLK |
| 17. | 28650.m000191_LISCL  | 579 | 1.33e-21 | AIAKKWETIQ | IDDLKLNHGEEVAVNCLFRSKNLLDETIV  | VNSPRNAVLN |
| 13. | 28650.m000186_LISCL  | 476 | 2.71e-21 | SIAQNWESIQ | YEDFKIDRNEMIVVNCLYRLKNIIPDDTMV | VNSMRDSILK |
| 39. | 29634.m002156_SCL4/7 | 425 | 6.85e-21 | PILTPIQELN | ESNFRVDPDEVLA VNFMLQLYNLLDETYG | AVETALKMAK |
| 15. | 28650.m000189_LISCL  | 476 | 6.93e-20 | AIAQKWETIQ | GEDLQIDKDEVVA VCCMNRLKNLPDDTIV | LDSPRDAVLR |
| 16. | 28650.m000190_LISCL  | 630 | 1.30e-19 | IAAQNWENIR | IEELKINSNEVLA VNCARFKNLLDEIVE  | VDCPRNAVLD |
| 29. | 30169.m006225_PAT1   | 431 | 1.97e-19 | VVSAKLGDL  | RESLGCPEEPLAVNFAFNLYRMPDESVS   | TENPRDELLR |
| 5.  | 30190.m011131_DLT    | 465 | 1.95e-18 | PVVDRLEDVR | LWMLHVKEGESVA VNCVFQMHKTLVDGNG | GALRDFLGLI |

Table S2. Cont.

|     |                     |     |          |            |                               |            |
|-----|---------------------|-----|----------|------------|-------------------------------|------------|
| 21. | 30147.m013794_Os4   | 346 | 4.18e-18 | VVESTLENLQ | PDDIKVFDGEVLVVNSILQLHCVVKESRG | ALNSVLQTIH |
| 3.  | 29807.m000482_DELLA | 334 | 1.16e-17 | VAASRLEDVK | PWMLQVNPKEAIVNSIMQLHKLLGSDPN  | RNLSIDMVLN |
| 18. | 29767.m000200_LISCL | 555 | 1.82e-17 | AIAKKWETIK | FEELKIDREEIIVVTCFYRAKNLLDETVV | VDSPKDIVLR |
| 22. | 30169.m006306_Os4   | 359 | 8.17e-17 | LESVTPSLLT | RENLNLRDGEALFFNSIMHLHKFVKESRG | SLKAILQAIK |
| 38. | 30131.m007244_SCL3  | 230 | 3.73e-16 | PIMSKLEDLD | IESLRVKTGEALAVSSVLQLHSLLAADDE | LLKQKSPATK |
| 37. | 30024.m001746_SCL3  | 210 | 1.47e-15 | PIVSKLENLD | IEKLRVKTGEALAISSVLQLHSFLASDDE | LRKRSPVTLK |
| 46. | 30156.m001710_SHR   | 254 | 3.49e-15 | HFESLLNHL  | PSALNLRDDEALVINCQNWLRYLSNEQKC | RAQDSSLRDT |
| 9.  | 29908.m006159_HAM   | 304 | 5.53e-15 | CRLDSEDFR  | PSALKLVRGEALIMNCMLHLPFHSYRAPD | SVASFLSGSK |
| 20. | 29929.m004746_Os4   | 326 | 1.83e-14 | WVESSELEKL | STDFKLLDGEVVIINSILQLHCAVKESRG | ALNTVLQILH |
| 43. | 29661.m000901_SHR   | 236 | 1.27e-13 | FSSLIEQLRV | QNLVYTDSGEALVINCHMLPHYIPEETLS | GIHNTTSSN  |
| 36. | 29790.m000809_SCL3  | 218 | 2.06e-13 | PLNISLRDLT | ADMLQVASGEALAFISILNLHLLAEDDR  | VDAHFGGNRS |
| 45. | 29706.m001281_SHR   | 365 | 3.07e-12 | LDNHPLQSLN | AQVINTNPEDTLVVCAQFRLHHLNHNNPD | ERTEFLKVL  |

Motif 11

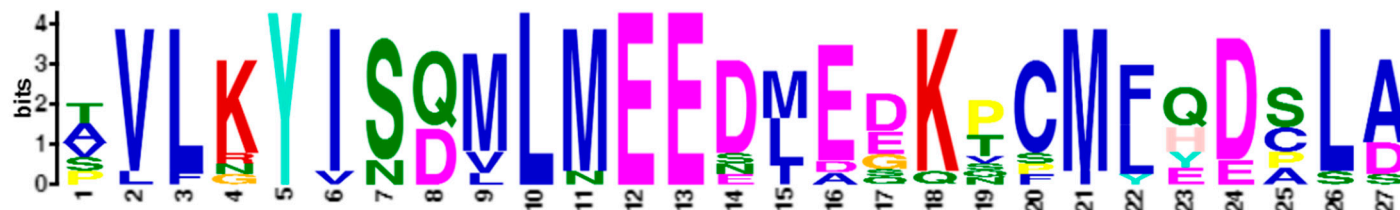

|     |                     |     |          |            |                              |            |
|-----|---------------------|-----|----------|------------|------------------------------|------------|
| 15. | 28650.m000189_LISCL | 69  | 4.51e-33 | YNSETSNFSQ | AVLKYISDMLMEEDLEDKPCMLQDCLA  | LQAAEKSLYD |
| 14. | 28650.m000187_LISCL | 77  | 1.29e-31 | SSEGHPN    | AVLKYISDMLMEEDLEGKTCMLQDCLA  | LQAAEKSLYD |
| 17. | 28650.m000191_LISCL | 84  | 1.86e-30 | SPSDDNDFSE | TVLNYSQMLMEEDMEQKPCMFHDPLA   | LQAAERSLYD |
| 18. | 29767.m000200_LISCL | 82  | 1.02e-29 | DSPEDCDFSD | TVLRYSQMLMEEDIEDKTCMLQDSDL   | LQAAEKSFYD |
| 12. | 27568.m000253_LISCL | 80  | 2.35e-28 | DLHEDFDFSD | VVLKYISDMLMEEDIEEKTCTMFQESSA | ALQAAEKSLY |
| 16. | 28650.m000190_LISCL | 111 | 2.01e-27 | SPSDDSDSSD | PVLKYISQMLMEENMEDKPPMYDPLD   | LKATEKSLYD |
| 13. | 28650.m000186_LISCL | 82  | 1.01e-25 | DSPDNDISN  | VVLKYISDMLMEEELSKNFMFEDCLA   | LQAAEKSFYD |

Table S2. Cont.

Motif 12

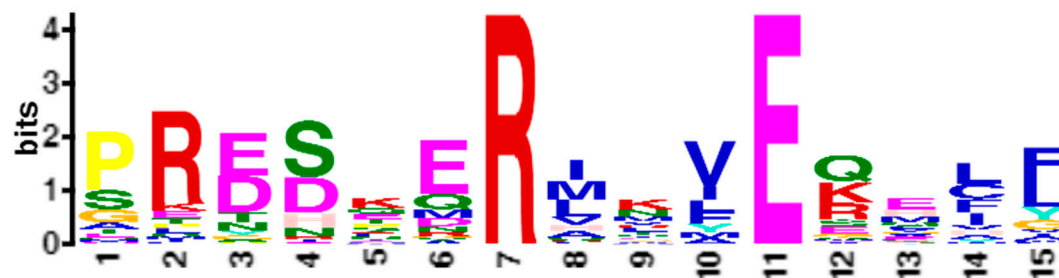

|     |                       |     |          |             |                  |            |
|-----|-----------------------|-----|----------|-------------|------------------|------------|
| 25. | 27613.m000642_PAT1    | 441 | 9.53e-15 | AIFESIDVTL  | PRGHKERINVEQHCL  | AREVVNIVAC |
| 28. | 29949.m000124_PAT1    | 450 | 1.15e-14 | AMFESIDVTL  | SREHKERINVEQHCL  | ARDVVNIAC  |
| 27. | 29648.m001919_PAT1    | 461 | 3.94e-14 | AVFESLDATL  | PRESQDRMNVEKQCL  | ARDIVNIVAC |
| 24. | 27529.m000047_PAT1    | 445 | 4.96e-12 | AMFESIDAGS  | SRDDKQRINAEQHCV  | ARDIVNMIAC |
| 13. | 28650.m000186_LISCL   | 561 | 6.38e-12 | ALFDMIDSTI  | PREEPERMMFEKEVF  | GRYAVNVIAC |
| 26. | 28166.m001040_PAT1    | 362 | 7.22e-12 | AMFESIDVRL  | PRERKDRIGVEQHCL  | AKDIVNIAC  |
| 17. | 28650.m000191_LISCL   | 664 | 9.24e-12 | ALFDMFDTNM  | SREDQMRLKFEKEYF  | GREALNVIAC |
| 22. | 30169.m006306_Os4     | 442 | 1.18e-11 | IFDSLEASLL  | PRNSRQRMKIEKLHF  | AEEIRNIVAY |
| 18. | 29767.m000200_LISCL   | 640 | 1.18e-11 | SLFDMLDIV   | PREDMERMLIEKEII  | GREALNVVAC |
| 37. | 30024.m001746_SCL3    | 350 | 1.68e-11 | ALFDCLESTV  | SRTSLERLKVEMLF   | GEEIKNIISC |
| 12. | 27568.m000253_LISCL   | 640 | 1.89e-11 | TLFDMLETNV  | PREIPERMLIEREIF  | GWEAKNVIAC |
| 14. | 28650.m000187_LISCL   | 586 | 3.76e-11 | ALFDMFEINV  | PREDDQRMLYEKAIF  | GRDIMNVIAC |
| 23. | 30131.m007029_Os43    | 587 | 1.37e-10 | AIFDSLDATE  | PPDSTQRAKVEQYIF  | APEIRNIVAC |
| 39. | 29634.m002156_SCL4/7  | 507 | 5.49e-10 | AVFESLEPNL  | SRDSTERLQVERLLL  | GRRIAGAVGP |
| 21. | 30147.m013794_Os4     | 428 | 5.49e-10 | AIFDSLDAAML | PRYDTRRAKMEQFYF  | AEEIKNIVSC |
| 15. | 28650.m000189_LISCL   | 561 | 6.63e-10 | SLFDMFEAIA  | TREDQERLVFERELI  | GKDVMNVVAC |
| 16. | 28650.m000190_LISCL   | 715 | 7.99e-10 | SLFDMFDSTL  | SREDQGRMMLENEIY  | GREAMNVVAC |
| 38. | 30131.m007244_SCL3    | 371 | 9.61e-10 | ALFDCLESTV  | SRPSIERQKVEKMLL  | GEEIKNIAC  |
| 29. | 30169.m006225_PAT1    | 516 | 1.15e-9  | ALFESIESTV  | QRDHTERVKVEEGLG  | RKLANSVACE |
| 20. | 29929.m004746_Os4     | 408 | 1.51e-9  | AIFDSLDTML  | PKYDTRKRVKIEQFFY | GEEIKNIVSC |
| 42. | 30073.m002204_SCR     | 715 | 1.80e-9  | ALFDSLGAZY  | GESEERHVVEQQLL   | SREIRNVLAV |
| 34. | 29910.m000940_Rc_GRAS | 483 | 2.15e-9  | AYFDCLDACM  | ERNDKNRMIMESMYF  | GIGIKNMIAT |
| 41. | 29872.m000537_SCR     | 341 | 3.92e-9  | ALFDALGDGL  | GIDSVERHTVEQQLF  | GCEIRNIVAV |
| 43. | 29661.m000901_SHR     | 342 | 1.23e-8  | IPYDVTDTFL  | PRGSKQRQWYEADIC  | WKIENVIAHE |

Table S2. Cont.

|     |                       |     |         |            |                 |            |
|-----|-----------------------|-----|---------|------------|-----------------|------------|
| 32. | 29889.m003284_Rc_GRAS | 461 | 1.55e-8 | AYFDCFDACM | ERDDPNRMAAESVFF | HHGIRNIVAS |
| 44. | 29661.m000923_SHR     | 414 | 2.85e-8 | VYFESLEESF | SRTSNERLMLERSAG | RAIVDLVACQ |
| 19. | 29728.m000844_Os19    | 354 | 3.07e-8 | AMYDSLDDCL | PLESSERLSIEKNHL | GKEIKSMLNY |
| 5.  | 30190.m011131_DLT     | 548 | 3.07e-8 | AIFDSINTSL | PLDSLVRIKIEEMFA | REIRNIVACE |
| 46. | 30156.m001710_SHR     | 342 | 3.56e-8 | IPFDALETFL | PTDSCQRIEYESDIG | HKIENIISYE |
| 40. | 28492.m000479_SCR     | 414 | 3.83e-8 | TLFDSLGAFL | PCDDSSRHRVEHCLL | YREINNVLAI |
| 45. | 29706.m001281_SHR     | 450 | 4.43e-8 | FLDSTSSAFK | GRESEERRVMEGEAA | KALINCGEMN |
| 9.  | 29908.m006159_HAM     | 387 | 2.48e-7 | ALYDSLEAGF | PMQSRARALVERVFL | GPRIAGSLDR |
| 33. | 29889.m003285_Rc_GRAS | 475 | 4.43e-7 | SAYFDCLESC | MKDNSNRMILESLHF | GEGIKNIVAT |

Motif 13

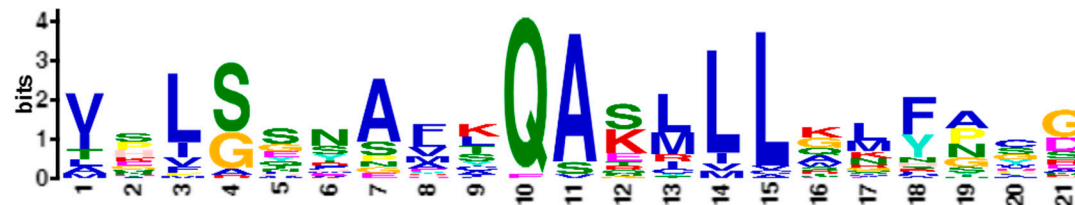

|     |                       |     |          |             |                        |            |
|-----|-----------------------|-----|----------|-------------|------------------------|------------|
| 2.  | 29692.m000540_DELLA   | 551 | 1.22e-19 | TRLGLAGFAP  | VHLGSNAFKQASMLLALFAGG  | DGYRVDENNG |
| 1.  | 28677.m000055_DELLA   | 514 | 1.22e-19 | TRFESAGFDR  | VHLGSNAFKQASMLLALFAGG  | DGYRVEENNG |
| 39. | 29634.m002156_SCL4/7  | 559 | 4.62e-16 | ILMESC GFES | VALSHYAMSQAKILLWYNYS   | SLYSLVESQP |
| 23. | 30131.m007029_Os43    | 638 | 1.61e-15 | KLMGKGFKG   | VPLSANAVTQSKILLGLYSCD  | GYRLTEDKGC |
| 42. | 30073.m002204_SCR     | 765 | 5.29e-15 | EKLRSQGFKG  | ISLAGNAATQATLLLGMFSPD  | GYTLVEDNGT |
| 41. | 29872.m000537_SCR     | 391 | 6.52e-15 | NELRRAGFQP  | VSLGGNPAAQASLLLGMFPWK  | GYTLVEEENG |
| 3.  | 29807.m000482_DELLA   | 467 | 1.09e-14 | SRLTAAGFMP  | LHLGSNAFKQASMLLTLFSSE  | GYCVEENDGC |
| 37. | 30024.m001746_SCL3    | 401 | 4.79e-14 | QRDLAGFGN   | VPLSYCGLLQARRLLQGYGCD  | GYRIKDENG  |
| 38. | 30131.m007244_SCL3    | 422 | 5.27e-14 | LRLELAGFGR  | VPLSYHGMQLQASRLLQSYGYD | GYKIKEENG  |
| 32. | 29889.m003284_Rc_GRAS | 512 | 5.27e-14 | SFFARFGMIQ  | TELSTSSLYQASLVLKKFPCG  | SSCTLDVNEK |
| 9.  | 29908.m006159_HAM     | 436 | 3.29e-13 | EWSSGAGFRP  | VNISFANHCAKLLLGLFNDG   | YRVEELGCNR |
| 33. | 29889.m003285_Rc_GRAS | 526 | 4.68e-13 | AFFTRFGMLE  | TELSTSSLCQAKLIKKFACG   | NACTLSMDGK |
| 34. | 29910.m000940_Rc_GRAS | 534 | 1.01e-12 | AFFARFGMVE  | TDLSSALLQANLIVKKFACG   | NCFTLDRNGK |
| 35. | 30076.m004651_Rc_GRAS | 579 | 1.67e-12 | AFFSRFRMVE  | IGFSESALYQASLVCKQFACG  | SSCSLDKNGK |
| 30. | 29889.m003281_Rc_GRAS | 389 | 2.51e-12 | DYFIRFGMVE  | TQVSMSSFYQAEMLKNFASG   | KSCLLVRNGK |
| 40. | 28492.m000479_SCR     | 466 | 2.72e-12 | LAARSTFMQ   | VPMSGNSMAQAQLILNMFPPA  | HGYSLAQGEG |
| 5.  | 30190.m011131_DLT     | 598 | 1.04e-11 | KLMEQGGFRC  | MGISEREVLQSQMLLKMYSC   | DYRVKERQDR |
| 19. | 29728.m000844_Os19    | 407 | 1.34e-10 | GRMENHGFSG  | MKLSSKSLIQAKLLLKIRTHH  | SPPQFNGENS |
| 43. | 29661.m000901_SHR     | 392 | 3.43e-8  | QRMRNANFRS  | ISFGEEAVSEVKTMLGEHAAG  | WGLKKEEDDL |

Table S2. Cont.

Motif 14

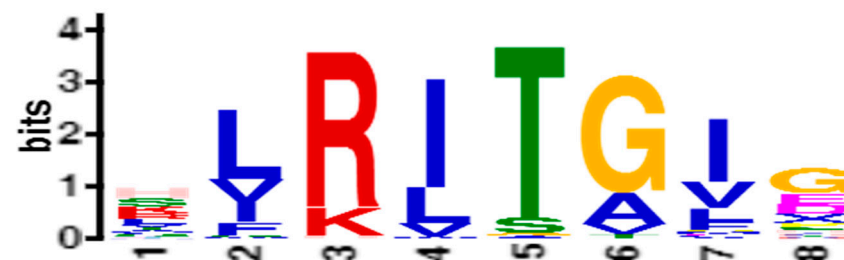

|     |                       |     |          |             |          |            |
|-----|-----------------------|-----|----------|-------------|----------|------------|
| 5.  | 30190.m011131_DLT     | 420 | 1.12e-10 | SLASRTNPPS  | HVRITGIG | ESKQELNETG |
| 38. | 30131.m007244_SCL3    | 185 | 3.65e-10 | TLSARPEGPP  | HLRITGIH | EQKEVLEQMA |
| 37. | 30024.m001746_SCL3    | 165 | 3.65e-10 | ALSARREGPP  | HLRITGIH | QQKEVLDQMA |
| 12. | 27568.m000253_LISCL   | 504 | 9.99e-10 | RLSSRPGGPP  | KLRITGID | FPHPGFRPAE |
| 17. | 28650.m000191_LISCL   | 528 | 1.47e-9  | RLSKREGGPP  | KLRITGIE | LPQSGFRPGE |
| 16. | 28650.m000190_LISCL   | 578 | 1.47e-9  | L LSMRDGGPP | KLRITGIE | LPQQGFRPAE |
| 14. | 28650.m000187_LISCL   | 450 | 1.47e-9  | RLSQRPGGPP  | KLRITGIE | LPQPGFRPAE |
| 15. | 28650.m000189_LISCL   | 425 | 2.60e-9  | HLSTRPGGPP  | KVRITGID | YPQPGFRPGE |
| 27. | 29648.m001919_PAT1    | 325 | 6.99e-9  | TLANQPGKPP  | HLRLTGID | DPESVQRSTG |
| 28. | 29949.m000124_PAT1    | 314 | 7.58e-9  | AFAARPGGPP  | RIRITGID | DSTSAYARGG |
| 34. | 29910.m000940_Rc_GRAS | 355 | 1.00e-8  | LVSRCDCPLE  | HLKITAIG | TTSRELIENT |
| 25. | 27613.m000642_PAT1    | 305 | 1.53e-8  | ALAARPGGPP  | HVRLTGID | DSTSAYARGG |
| 20. | 29929.m004746_Os4     | 281 | 3.09e-8  | LANRPDKKPR  | CLRITGVG | NSAERLQALG |
| 3.  | 29807.m000482_DELLA   | 284 | 4.33e-8  | ALALRPGGPP  | LLRLTGIG | PPSPDGRDSL |
| 23. | 30131.m007029_Os43    | 463 | 4.92e-8  | ALAARPGGAP  | FLRITGVG | SCIESVRETG |
| 21. | 30147.m013794_Os4     | 301 | 6.74e-8  | LANRAGKPPC  | RLRITAVG | LCVGRFQTIG |
| 19. | 29728.m000844_Os19    | 229 | 6.74e-8  | SEKASSNRI   | SLRITGLG | RSLEELQETE |
| 24. | 27529.m000047_PAT1    | 309 | 1.83e-7  | ALADRPGGPP  | AIRITGVD | DPQSAYARGG |
| 2.  | 29692.m000540_DELLA   | 370 | 2.04e-7  | ALALRPGGPP  | AFRLTGIG | PPSHDNSDHL |
| 1.  | 28677.m000055_DELLA   | 330 | 2.04e-7  | ALALRPGGPP  | AFRLTGIG | PPQSNNTDAL |
| 4.  | 30170.m013590_DELLA   | 221 | 2.44e-7  | DLAARPGGPP  | TIRISGIG | FPNHDNSDYL |
| 13. | 28650.m000186_LISCL   | 425 | 2.92e-7  | DLSTRHGGPP  | RLHITGIE | FPQPGFRPAE |
| 44. | 29661.m000923_SHR     | 264 | 5.36e-7  | ALATRTDETP  | HLRLTTIV | ASKTNGGGGG |
| 33. | 29889.m003285_Rc_GRAS | 348 | 6.32e-7  | LVSDFDCNLE  | LLKITAVG | TTSKHLIKDT |



Table S2. Cont.

|     |                       |     |         |            |           |            |
|-----|-----------------------|-----|---------|------------|-----------|------------|
| 6.  | 29646.m001070_HAM     | 314 | 6.90e-7 | DHFCNKLTSP | VLRTAVV   | TEDYAIQTQL |
| 9.  | 29908.m006159_HAM     | 251 | 7.43e-7 | VSRKDGPTTP | HLRITALS  | RGGNSGKRSI |
| 41. | 29872.m000537_SCR     | 217 | 8.06e-7 | ILASRSKKIR | SMRITGFG  | SSSELLESTG |
| 40. | 28492.m000479_SCR     | 291 | 8.06e-7 | ILATRMEGPP | HIRMTGMG  | TSMDLLVETG |
| 22. | 30169.m006306_Os4     | 309 | 8.74e-7 | TLASRPEGPP | KVRITGLI  | NDHQNLLELE |
| 39. | 29634.m002156_SCL4/7  | 374 | 1.03e-6 | LATRSAGRPL | SIRISGIP  | APVLGKSPAA |
| 7.  | 29820.m000985_HAM     | 280 | 1.10e-6 | GYNQRHLQOI | TLKITAIK  | WREEHPWRKL |
| 31. | 29889.m003282_Rc_GRAS | 252 | 1.50e-6 | ENVAEANRSH | LLKITAVE  | TTSKHLIEET |
| 42. | 30073.m002204_SCR     | 592 | 1.74e-6 | ILASRPGGPP | YVRTLGLG  | TSIEALEATG |
| 45. | 29706.m001281_SHR     | 306 | 1.86e-6 | LTRRSGGPPP | LVRITVIT  | ATVESDQNTE |
| 35. | 30076.m004651_Rc_GRAS | 400 | 2.01e-6 | LAERQQRPLE | HLKVITALG | LTGKGGKIEE |
| 30. | 29889.m003281_Rc_GRAS | 210 | 2.49e-6 | LANRQECPIE | LLKISGVG  | VKASRQRIED |
| 29. | 30169.m006225_PAT1    | 382 | 3.78e-6 | LSERLNGKPA | TVKITAVA  | DNSAEKERL  |
| 11. | 30174.m008828_HAM     | 510 | 5.30e-6 | ELALRNGGVS | SLKITAFV  | SPSHDEIELG |
| 46. | 30156.m001710_SHR     | 184 | 3.18e-5 | ALAKRPEGPP | SLRITVPF  | TRPQVPPWLN |
| 8.  | 29820.m000986_HAM     | 481 | 4.24e-5 | ETVKEKQSLY | KVRIGGEW  | NNEMILEWRG |
| 32. | 29889.m003284_Rc_GRAS | 150 | 1.38e-4 | GSSRGLSTEE | VIRIAGAR  | FIQSCWQAVD |

Motif 15

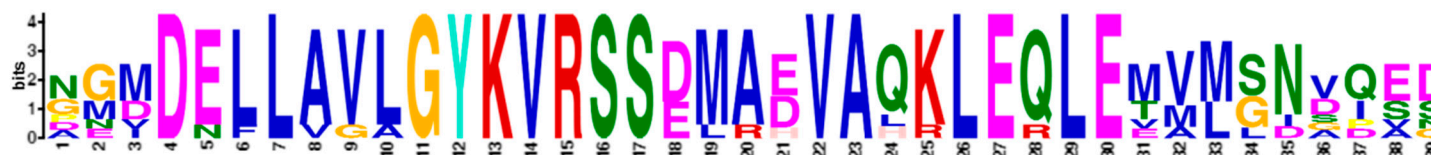

|    |                     |    |          |            |                                         |            |
|----|---------------------|----|----------|------------|-----------------------------------------|------------|
| 2. | 29692.m000540_DELLA | 54 | 5.80e-46 | IWEDEEAKGD | GGMDELLAVLGYKVRSSDMAEVAQKLEQLEEVMGNVQED | GLCQLASETV |
| 1. | 28677.m000055_DELLA | 37 | 5.73e-44 | EEEEQQQDQD | GGMDELLAVLGYKVRSSDMAEVAQKLEQLEMVMGIAQED | GISHLSDTVH |
| 3. | 29807.m000482_DELLA | 27 | 1.37e-27 | SSSSITNKP  | PEIDNLLAGAGYKVRSSDLRHVAQRLELETAMLNSPSS  | HLSVLASDTV |

Table S2. Cont.

Motif 16

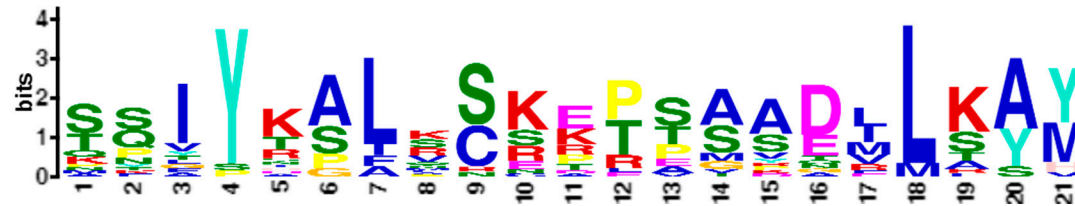

|     |                     |     |          |            |                        |            |
|-----|---------------------|-----|----------|------------|------------------------|------------|
| 28. | 29949.m000124_PAT1  | 234 | 1.06e-19 | GLVARLASSG | SSIYKSLRCKEPASADLLSYM  | HILYEVCYPF |
| 18. | 29767.m000200_LISCL | 425 | 1.34e-18 | GLDARLAGTG | SQIYKGLVSKRTSAANVLKAY  | HLILAACPFR |
| 25. | 27613.m000642_PAT1  | 225 | 1.96e-18 | GLVARLASSG | SSIYRALRCKEPASAEELLSYM | HILYEVCYPF |
| 12. | 27568.m000253_LISCL | 424 | 4.09e-18 | GLEARMAGSG | TQIYKAFMSRPTTAADVKAH   | HLFLAACPFR |
| 17. | 28650.m000191_LISCL | 448 | 4.59e-17 | GLEARLAGTG | AQIYTALSSEKLSAADMLKAY  | LAYISACPFN |
| 27. | 29648.m001919_PAT1  | 245 | 3.41e-16 | GLAARMAASG | KYLYKALKCKEPPSSDRLAAM  | QILFEICPCF |
| 26. | 28166.m001040_PAT1  | 256 | 5.11e-16 | GLVARKESSG | NNIYHALRCREPESKDLLSYM  | QILYEICPYL |
| 24. | 27529.m000047_PAT1  | 229 | 3.21e-15 | GLRARVELSG | SKIYRALKCEAPVSSDLMTYM  | GILFKICPYW |
| 16. | 28650.m000190_LISCL | 498 | 3.62e-14 | ARLAGSVTGM | QSFYTSLASRRRRTAADILRAY | KTHLHACPFK |
| 14. | 28650.m000187_LISCL | 370 | 3.37e-13 | ALETRLAGTG | TPAYSPLSSKTPVSDILKAY   | QVYVKACPFK |
| 13. | 28650.m000186_LISCL | 345 | 2.49e-12 | GLEARLAGTG | TPGYAPAVNSTTSAAGMLKAY  | HAYTTACPFQ |

Motif 17

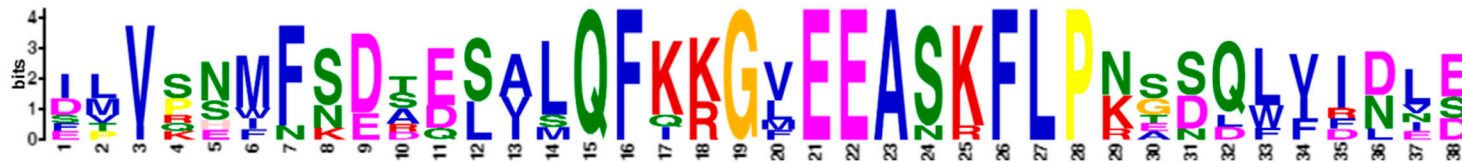

|     |                     |     |          |            |                                        |            |
|-----|---------------------|-----|----------|------------|----------------------------------------|------------|
| 16. | 28650.m000190_LISCL | 278 | 2.77e-38 | GDGIMGSSPS | EMVQNMFSDTDSVLQFKRGLEEASKFLPRASQLVIDLE | SNSFANGQKE |
| 17. | 28650.m000191_LISCL | 230 | 1.95e-31 | HDVMGSFESK | IVVPNFFSERELALQFQRGVEEANRFLPKENQLVIDLE | TNASIPEMKE |
| 12. | 27568.m000253_LISCL | 211 | 4.65e-28 | AADGLVDSPL | STISEIFSDSESIHQFKKGFEASKFLPNGSLFIDLES  | TGLFLKDLRE |
| 18. | 29767.m000200_LISCL | 206 | 9.34e-27 | DGLVHSPNST | FPVPHWNNESQSIHQFIKGVVEASKFLPNGDDLFRNIE | VNRFLEKPK  |

Table S2. Cont.

Motif 18

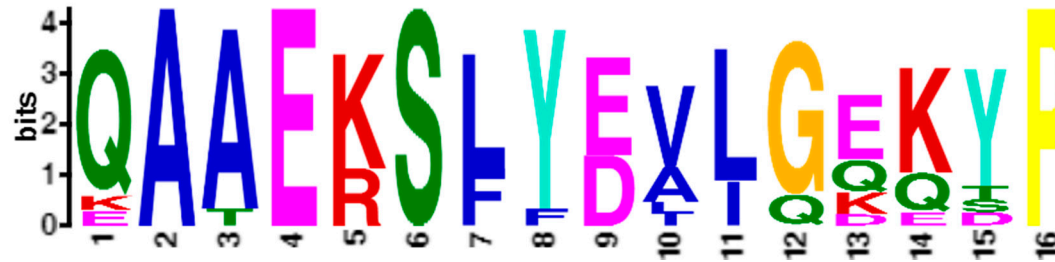

|     |                     |     |          |             |                   |             |
|-----|---------------------|-----|----------|-------------|-------------------|-------------|
| 15. | 28650.m000189_LISCL | 97  | 3.50e-20 | PCMLQDCLAL  | QAAEKSLYDVLGEKYP  | PICDQSPSSI  |
| 13. | 28650.m000186_LISCL | 110 | 8.30e-20 | NFMFEDCLAL  | QAAEKSFYDVLGQKYP  | ASLDQSPFLD  |
| 18. | 29767.m000200_LISCL | 110 | 1.06e-19 | TCMLQDSL DL | QAAEKSFYEV LGKKYP | PSPEPKR VSI |
| 17. | 28650.m000191_LISCL | 112 | 2.48e-19 | PCMFHDPLAL  | QAAERSLYDVLGEKYP  | SSPNQSSSFG  |
| 14. | 28650.m000187_LISCL | 105 | 1.44e-18 | TCMLQDCLAL  | QAAEKSLYDVLGQEYP  | HLSHCPQIV   |
| 12. | 27568.m000253_LISCL | 109 | 2.73e-18 | CMFQESSAAL  | QAAEKSLYELIGEKYP  | PSINYDSA AH |
| 16. | 28650.m000190_LISCL | 139 | 2.98e-15 | PPMYDPLDL   | KATEKSLYDVLGEQDP  | SSLESPQYI   |

Motif 19

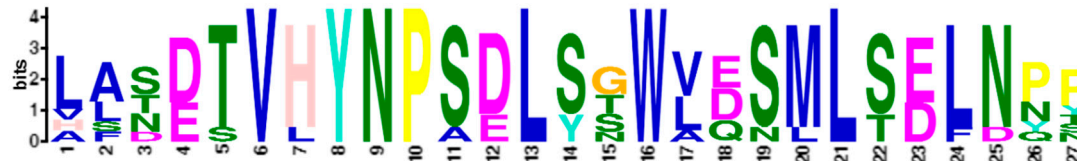

|    | Name                | Start | P-Value  | Sites      |                             |            |
|----|---------------------|-------|----------|------------|-----------------------------|------------|
| 2. | 29692.m000540_DELLA | 97    | 6.38e-30 | GNVQEDGLCQ | LASETVHYNPSDLSTWLESMLSELNPN | PNFDPSQQPD |
| 1. | 28677.m000055_DELLA | 79    | 1.18e-29 | MGIAQEDGIS | HLSDTVHYNPSDLSGWVQSMLSELNPN | LDTIQNQDS  |
| 3. | 29807.m000482_DELLA | 70    | 1.20e-23 | LNSPSSHLSV | LASDTVLYNPSDLSSWVDSLLETFNQS | QPLPSLPPDL |

Table S2. Cont.

Motif 20

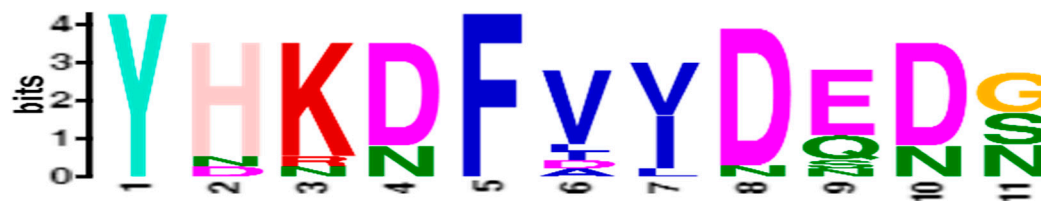

|     |                     |     |          |            |             |            |
|-----|---------------------|-----|----------|------------|-------------|------------|
| 16. | 28650.m000190_LISCL | 784 | 3.86e-15 | EKCRHKLKTW | YHKDFVIDEDN | NWMLQGWKGR |
| 12. | 27568.m000253_LISCL | 709 | 1.43e-14 | AAAKEKVNAL | YHKDFVIDEDS | RWLLQGWKGR |
| 14. | 28650.m000187_LISCL | 655 | 6.70e-14 | KKVRCTVRSE | YHKDFVVDENG | RWMLQGWKGR |
| 15. | 28650.m000189_LISCL | 629 | 1.72e-13 | VKRVRNIKND | YHKDFAVDEDG | HWMLMGWKGR |
| 17. | 28650.m000191_LISCL | 733 | 1.54e-12 | KKLKCRVKEG | YHNDFVVDQDG | QWMLQGWKGR |
| 13. | 28650.m000186_LISCL | 630 | 4.07e-11 | KKVITTVKSN | YKNFIVDEDS  | QWMLQGWKGR |
| 18. | 29767.m000200_LISCL | 709 | 4.78e-11 | KQAIEKVRKL | YHKNFLINEDG | RWLLQGWKGR |

**Table S3.** Information of all primers used in this study.

| Gene Name     | Forward (from 5' to 3') | Reverse (from 5' to 3') |
|---------------|-------------------------|-------------------------|
| 28677.m000055 | TCAAAAGCTTGAACAGCTTGAA  | ACCAGGAATGGCTCTAAGATCA  |
| 29692.m000540 | GGTTGGAAATTGGCTCAGTTAG  | CGTTCTTGCTCAACGATAGTA   |
| 29807.m000482 | CATTTGTTGATGACATGTGCTG  | GGACACGCCTCATAAAAGTGAT  |
| 30170.m013590 | TTTCGGATTTAGCCAAGTCAAT  | AAATATTGGGGGTAGAGCCTGT  |
| 30190.m011131 | CAGGCTCCTTCTCTCTGACAT   | TCCACAACATTCTCACTTGGTC  |
| 29646.m001070 | GAGGATTCCACTCCTACGCTAA  | CTGCTCGGATAAGCTCTTGAAT  |
| 29820.m000985 | TGGCTCTTCTCAACAACAAAA   | AGGCTAGCCATTCTTTTCTTCC  |
| 29820.m000986 | CGGTCTCAAATTAAGGTGGAG   | CATCCCCATCTCCAAAAGTAAG  |
| 29908.m006159 | ACTTGCAACTCAAACCCAAACT  | TTGCAAGGCGTCAGTAAAATAA  |
| 29916.m000544 | AAGAAAGGATGAATGGGCTACA  | ATCTACAATCCCTAACCCAGCA  |
| 30174.m008828 | CCTTGAATTCTGGTTCTTGGTC  | GCTTCCAGTGATTCAAGTAGGC  |
| 27568.m000253 | TAGCACAGAAGTGGGACACAGT  | AGTAGTGGAAAACAGCCTCTCG  |
| 28650.m000186 | ATTAGCACATTTCTTCGCCAAT  | AGGCCATTGAAAACCATAAAGA  |
| 28650.m000187 | ACAATGCACCATTCTTTGTCAC  | TGATCTAGTGAGAGCTGCCTGA  |
| 28650.m000189 | ATCTGCAGCCTTTTAGATCGAG  | AGAAGAAGGGGATTGATCACAA  |
| 28650.m000190 | ATCAAATGGTGGAAAGACTCGT  | TAAAAGCTTTGCATTCCAGTGA  |
| 28650.m000191 | AGGTGGTTGTGAAGGAAGAGAA  | TGTAGTGCCTTGTTTGATCCAC  |
| 29767.m000200 | TCGTAACATTGAGGTCAACAGG  | TTACCCTCCCCAGCACTATAAA  |
| 29728.m000844 | TGGCAATCGTTGATACAGATTC  | AGCTGTGGCTACATTGTTCTCA  |
| 29929.m004746 | ATCGAAGCTATGGAAGAAGCAG  | AAGTAGCGTAAGCCGATCAGAC  |
| 30147.m013794 | CGAGCTCTAAGTTTCGCAGAAT  | TCTCCATGATTTTCACCTTCT   |
| 30169.m006306 | AATCCTCCAAGCAATCAAGAGA  | GCCTCTCAATCCTATCACAACC  |
| 30131.m007029 | AGCTGGATGGAGATGTTGAAGT  | TGGACTCTGTCCTTCCCTTTA   |
| 27529.m000047 | GAGCAAATGGTGTGAGTCTCTG  | AATCCTAGGCTCGTATTCCACA  |
| 27613.m000642 | AGGATGGATCCAATCAAATCAC  | AGAACTTCTGAAGATGCCAAC   |
| 28166.m001040 | TCCACCAGACAATCTAAAGCAA  | TCTGCATGTACGAAAGCAAATC  |
| 29648.m001919 | GTGAATTTTGCTTCCAACCTCC  | TTTCAACATTCATCCTGTCTG   |
| 29949.m000124 | GCATTTCGTATTACAGGCATTGA | TGGTTCTGAGTGCTGACACTTT  |
| 30169.m006225 | TGTTTGCCAAAGAACATATTGC  | TATTATCCGCAACAGCTGTGAT  |
| 29889.m003281 | TTTTGAGCACATGAAGATGGAC  | TCTTGGTGCAATCTTCTTTGA   |
| 29889.m003282 | CAAGCTGCTGAAATTCAAAATG  | ACTGATCACAAAACCTCGAGCAA |
| 29889.m003284 | TTCCTGCAATCCAAGAAATTG   | TGACTGCCCTAAAAGAGAAAGG  |
| 29889.m003285 | TGACTGCAATCTGGAGCTTTTA  | AGAATTTAGCCTATCGGGCAGT  |
| 29910.m000940 | TTTGCTGAAGCTCTCCATGATA  | GTCCATTGCATTCCATATCTGA  |
| 30076.m004651 | TATGTTCTGAATATGGCGCTTG  | GTTGAGCAGCTCCAAAGAAGAT  |
| 29790.m000809 | TGGGAAGTGAAGATAGGATGGT  | CATGCCAACAAATCATCAAACCT |
| 30024.m001746 | ACTTGTGGAAATCATGTTGCTG  | TCAAGAATGGAAACATCTCGAA  |
| 30131.m007244 | GCCTTGAGCATATCTCTCACCT  | ATTGCTTCTACAATGGCCTGAT  |
| 29634.m002156 | GTGAACATGGAGATCCAACCTGA | AACGATCCCAAAATCCACTATG  |
| 28492.m000479 | TGTTTCACATCCTGGCTACAAG  | CCTGTTGCATCGTACAGTGAAT  |
| 29872.m000537 | GAGACTCCTCGGTCTTTTGCTA  | GGAAAGCGTTGAAGATTTTCTG  |
| 30073.m002204 | AGCTACTTTGCTTCTTGGGATG  | TCAACAAAATGGTATTGGCAAG  |
| 29661.m000901 | CCACAAACTCATCAAATCCGTA  | TCATACCATTGTCTTTGCTTGC  |
| 29661.m000923 | TGTGGATGCTTAATGAACTTGG  | TCAAATGCTTCCATTATTGCAC  |
| 29706.m001281 | ATGAGGTTAGTCCTTGGTTTGC  | ACTGAAAATGGGGTCTCAGTGT  |
| 30156.m001710 | TCTTGGTAGTCTTGATGGAGCA  | ACTCATTGCTCCTTTGGATA    |
